# Supplementary material for: The phylogenetics of Teleosauroidea (Crocodylomorpha, Thalattosuchia) and implications for their ecology and evolution
Source: PeerJ. 2020 Oct 8;8:e9808. doi: 10.7717/peerj.9808 (PMC7548081; doi:10.7717/peerj.9808)
Supplement: Supplemental Information 2 [file peerj-08-9808-s002.xlsx]

## Sheet: HY_Matrix
Taxa	1	2	3	4	5	6	7	8	9	10	11	12	13	14	15	16	17	18	19	20	21	22	23	24	25	26	27	28	29	30	31	32	33	34	35	36	37	38	39	40	41	42	43	44	45	46	47	48	49
Postosuchus_kirkpatricki	0	?	?	0	?	0	2	?	0	0	?	?	?	2	?	?	?	?	0	?	?	?	?	0	0	1	0	1	1	0	0	0	0	0	0	?	0	?	1	0	0	0	?	0	0	?	0	0	3
Carnufex_carolinensis	0	?	?	?	?	0	2	0	0	?	1	?	0	?	?	?	?	?	?	?	?	?	?	?	?	?	0	?	1	0	0	0	0	0	0	?	0	0	1	0	?	?	?	0	0	?	0	0	1
Dromicosuchus_grallator	?	?	?	0	?	0	2	0	0	0	0	?	?	2	?	1	?	?	?	?	?	?	?	0	?	?	0	?	0	0	?	?	0	0	?	?	0	0	1	0	0	0	?	0	0	?	0	0	0
Hesperosuchus_cf_agilis	?	?	?	0	?	0	2	0	0	0	0	?	?	2	?	1	?	?	?	?	?	?	?	0	?	1	0	?	0	0	?	?	0	0	0	?	0	0	1	0	0	0	?	0	0	?	0	0	0
Dibothrosuchus_elaphros	0	0	0	0	?	0	2	0	0	0	0	?	?	?	?	?	?	0	0	?	?	?	?	0	?	1	0	?	1	?	?	?	?	0	0	0	0	?	?	?	?	0	?	0	0	0	0	0	3
Terrestrisuchus_gracilis	0	0	0	0	?	0	2	?	0	0	0	?	?	2	?	?	?	0	?	?	?	?	?	0	?	?	0	?	?	?	?	?	?	0	0	?	0	?	?	?	?	?	?	0	0	?	?	?	?
Junggarsuchus_sloani	0	0	0	0	?	0	2	0	0	0	0	?	?	2	?	1	0	0	0	?	?	?	?	0	?	?	0	1	1	0	0	0	0	0	0	0	0	0	1	0	0	0	?	0	0	?	0	0	0
Eopneumatosuchus_colberti	1	?	?	?	?	?	?	?	0	0	?	?	?	0	?	0	2	?	?	?	0	?	1	?	?	2	?	?	?	?	?	?	?	?	?	?	?	?	?	?	?	?	?	?	?	?	?	?	?
Hemiprotosuchus_leali	0	0	0	0	?	0	2	0	0	0	?	?	?	?	?	0	2	?	1	?	?	?	1	0	?	?	0	?	?	0	?	0	0	0	0	?	?	?	1	0	0	0	?	0	?	?	0	0	?
Protosuchus_richardsoni	0	0	0	0	?	0	2	0	0	1	1	?	?	0	?	0	2	1	1	?	?	0	1	?	?	2	0	1	1	0	0	0	0	0	0	0	0	?	1	0	0	0	?	0	0	?	0	0	0
Protosuchus_haughtoni	0	0	0	0	?	0	2	0	0	1	1	?	?	0	?	0	2	1	1	?	?	?	?	0	?	2	0	1	1	0	0	0	0	0	0	?	0	?	1	0	0	0	?	0	0	?	0	0	0
Fruitachampsa_callisoni	1	0	?	?	?	0	0	0	0	0	1	?	?	0	?	0	2	1	?	?	?	?	?	0	?	?	0	?	?	0	?	0	0	0	0	?	?	?	1	0	0	0	?	?	?	?	?	?	?
Mariliasuchus_amarali	1	4	0	0	?	0	2	?	0	0	2	?	?	0	?	0	?	0	0	?	?	0	?	0	?	2	0	1	1	0	0	0	0	0	5	0	?	?	0	0	0	?	?	?	?	?	?	?	0
Notosuchus_terrestris	1	4	0	0	?	0	2	?	0	0	2	?	?	0	?	0	2	0	0	?	?	0	1	0	?	2	0	1	1	0	0	0	0	0	5	0	?	0	0	0	0	?	?	?	?	?	?	?	0
Adamantinasuchus_navae	0	?	?	?	?	0	2	?	0	0	2	?	?	0	?	0	?	?	?	?	?	?	?	0	?	?	0	1	1	0	0	0	0	0	5	?	?	?	1	0	0	?	?	?	?	?	0	0	0
Sphagesaurus_huenei	0	{04}	0	0	?	0	2	?	0	0	2	?	?	0	?	0	?	0	?	?	?	?	?	?	?	2	0	1	1	0	0	?	0	0	5	?	?	?	1	0	0	?	?	?	?	?	0	0	0
Caipirasuchus_montealtensis	0	{04}	0	0	?	0	2	?	0	0	2	?	?	0	?	0	?	1	0	?	?	?	?	0	1	2	0	1	1	0	0	0	0	0	5	?	?	?	1	0	0	?	?	?	?	?	0	0	0
Baurusuchus_pachecoi	0	4	0	0	?	0	2	0	0	0	2	?	?	0	?	0	?	1	0	?	?	?	1	?	?	2	0	1	1	0	0	0	0	0	5	0	0	0	0	0	0	0	?	0	0	?	0	0	0
Araripesuchus_patagonicus	1	0	0	0	?	0	2	0	0	0	1	?	?	0	?	0	2	0	0	?	?	?	?	1	?	2	0	?	?	?	0	0	?	0	?	?	?	?	?	0	0	?	?	?	?	?	?	?	?
Montealtosuchus_arrudacamposi	0	0	0	0	?	0	2	0	0	0	1	?	?	0	?	0	2	0	0	?	?	?	?	1	?	2	?	1	0	0	0	0	0	0	5	?	0	0	1	0	0	0	?	0	0	0	0	0	0
Uberabasuchus_terrificus	0	4	0	0	?	0	2	0	0	0	1	?	?	0	?	0	?	0	0	?	?	?	?	?	?	?	0	1	0	0	0	0	0	0	5	0	0	0	1	0	0	0	?	0	0	?	0	0	0
cf_Hamadasuchus_rebouli	0	5	0	0	?	0	2	0	0	0	1	?	?	0	?	0	2	0	0	?	0	?	1	1	1	2	0	0	0	0	0	0	0	0	0	?	0	0	1	0	0	0	?	0	0	0	0	0	0
Sebecus_icaeorhinus	0	5	0	0	?	?	2	0	0	0	1	?	?	0	?	0	?	0	?	?	?	?	1	1	?	2	0	0	0	0	0	0	0	?	0	?	?	?	1	0	?	?	?	?	?	?	?	?	0
Mahajangasuchus_insignis	1	?	?	0	?	?	0	0	0	0	1	?	?	0	?	0	2	0	0	?	?	?	1	?	1	?	?	?	1	0	0	0	0	?	0	?	?	?	1	?	0	?	?	?	?	0	?	?	?
Alligatorium_meyeri	?	?	?	?	?	0	0	0	0	0	1	?	?	0	?	0	2	?	?	?	?	?	?	?	?	?	1	1	1	0	0	0	0	1	0	?	0	0	1	0	0	?	?	0	0	?	0	0	?
Theriosuchus_pusillus	1	{12}	?	1	?	0	0	0	0	0	1	?	?	0	?	0	2	0	0	?	?	?	1	1	1	2	1	?	1	0	0	0	0	1	0	0	0	0	1	0	0	?	?	0	0	?	0	0	2
Eutretauranosuchus_delfsi	1	1	0	1	?	0	0	0	0	0	1	?	?	0	?	0	2	0	0	?	?	?	?	?	?	2	1	?	1	0	1	0	0	1	0	?	0	?	?	?	0	?	?	?	?	?	0	0	?
Amphicotylus_stovalli	1	2	1	1	?	0	0	0	0	0	1	?	?	0	?	0	2	0	0	?	?	?	?	?	?	2	1	?	?	0	1	?	1	1	0	?	0	0	1	1	0	?	?	?	0	1	1	?	?
Goniopholis_baryglphaeus	1	?	?	?	?	0	0	0	0	0	1	?	?	0	?	0	2	0	0	?	?	?	?	?	?	?	1	?	1	0	1	0	1	1	?	?	0	?	1	1	0	?	?	0	0	?	?	?	0
Goniopholis_kiplingi	1	2	1	1	?	0	0	0	0	0	1	?	?	0	?	0	2	0	?	?	?	0	?	?	1	2	1	1	1	0	1	?	1	1	0	0	0	0	1	1	0	0	?	?	0	?	1	-	0
Goniopholis_simus	1	2	1	1	?	0	0	0	0	0	1	?	?	0	?	0	2	0	0	?	?	?	?	?	1	2	1	1	1	0	1	0	1	1	0	?	0	?	1	1	0	0	?	0	0	?	?	-	0
Anteophthalmosuchus_hooleyi	1	2	1	1	?	0	0	0	0	0	1	?	?	0	?	0	2	0	0	?	?	?	?	?	?	2	1	?	1	0	1	0	?	?	?	?	?	?	?	?	?	?	?	?	?	?	?	?	?
Anteophthalmosuchus_epikrator	1	2	1	1	?	0	0	0	0	0	1	?	?	0	?	0	2	0	?	?	?	?	?	?	1	2	1	1	1	0	1	0	1	1	0	?	0	0	1	?	0	0	?	0	0	1	1	-	?
Elosuchus_cherifiensis	1	2	1	1	?	1	1	0	0	0	3	?	?	0	?	0	2	0	0	?	?	?	?	?	?	2	1	1	?	0	0	?	0	1	0	?	?	0	?	0	0	0	?	0	0	2	2	-	?
Elosuchus_broinae	1	2	1	1	?	1	1	0	0	0	3	?	?	0	?	0	2	0	0	?	?	?	?	?	?	2	1	1	?	0	0	?	0	1	0	?	0	0	1	0	0	0	?	0	0	2	2	-	0
Vectisuchus_leptognathus	1	{12}	?	1	?	0	1	0	0	0	3	?	?	0	?	0	2	?	0	?	?	?	?	?	?	2	1	?	1	0	0	-	0	1	0	?	?	?	1	?	0	?	?	?	?	?	?	?	?
Pholidosaurus_schaumburgensis	1	0	1	1	?	1	1	0	0	0	1	?	?	0	?	0	2	0	0	?	?	?	1	?	?	2	1	?	?	0	0	-	?	?	?	?	?	?	?	?	?	?	?	0	?	?	?	?	?
Pholidosaurus_sp_Charente	1	2	1	1	2	1	1	0	0	0	3	?	?	0	?	0	2	0	0	?	?	?	?	?	?	2	1	?	?	?	0	-	0	1	0	?	0	0	1	0	0	0	?	0	0	1	1	-	0
Meridiosaurus_vallisparadisi	?	?	?	?	?	2	1	0	0	?	3	?	?	?	?	?	?	0	?	?	?	?	?	?	?	?	1	1	1	?	?	?	0	1	0	?	0	0	1	0	0	1	?	0	0	1	1	-	1
Chalawan_thailandicus	1	?	?	?	?	1	0	0	1	0	?	?	?	?	?	0	2	0	?	?	?	?	?	?	?	?	1	?	?	?	?	?	0	1	?	?	?	?	1	?	?	1	?	0	0	?	2	-	1
Sarcosuchus_hartti	?	?	?	?	?	?	?	?	1	?	?	?	?	?	?	?	?	?	?	?	?	?	?	?	?	?	1	?	?	?	?	0	?	?	?	?	?	?	?	?	?	?	?	0	?	?	?	?	?
Sarcosuchus_imperator	1	2	1	1	?	1	0	0	1	0	1	?	?	0	?	0	2	0	0	?	?	?	?	?	?	2	1	?	?	0	0	0	0	1	0	?	0	0	1	0	0	1	?	0	0	1	2	-	1
cf_Terminonaris_robusta	1	?	?	0	?	1	1	0	0	0	1	?	?	0	?	0	2	?	0	?	?	?	?	?	?	?	1	?	1	?	0	-	0	1	0	?	0	0	1	0	?	1	?	0	1	1	2	-	1
Oceanosuchus_boecensis	1	?	1	?	?	1	1	0	0	?	1	?	?	0	?	0	2	?	?	?	?	?	?	?	?	2	1	?	1	0	0	0	0	1	0	?	0	0	1	0	?	1	?	0	0	1	2	-	0
Pholidosaurus_purbeckensis	1	1	1	1	?	1	1	0	0	0	3	?	?	0	?	0	1	0	0	?	?	?	?	1	?	2	1	?	?	?	0	-	?	?	?	?	?	?	?	?	?	?	?	?	?	?	?	?	?
Fortignathus_felixi	?	?	?	?	?	{12}	?	?	0	?	?	?	?	?	?	?	?	?	?	?	?	?	?	?	?	?	1	?	?	?	?	0	?	?	?	?	?	?	?	?	?	?	?	?	?	?	?	?	?
Acherontisuchus_guajiraensis	?	?	?	?	?	1	1	?	0	?	0	?	?	?	?	?	?	?	?	?	?	?	?	?	?	?	1	?	?	?	?	0	?	?	?	?	?	?	?	?	?	?	?	?	?	?	?	?	?
Anthracosuchus_balrogus	1	?	?	0	2	0	0	0	0	0	1	?	?	0	?	0	2	0	0	?	?	?	?	?	?	?	1	?	?	0	?	?	0	1	1	?	1	1	1	0	0	0	?	1	0	1	1	0	2
Arambourgisuchus_khouribgaensis	1	?	?	0	?	1	1	0	0	0	1	?	?	2	?	1	0	0	?	?	?	?	?	?	?	?	1	0	0	?	0	-	0	1	0	?	?	?	1	0	?	0	?	0	1	?	0	0	0
Atlantosuchus_coupatezi	1	?	?	0	?	1	1	0	0	0	1	?	?	0	?	1	1	?	?	?	?	?	?	?	?	?	1	?	?	0	0	-	0	1	?	?	?	?	1	?	?	?	?	?	1	?	?	?	0
Cerrejonisuchus_improcerus	1	?	1	0	?	0	1	0	0	0	1	?	?	0	?	0	2	0	?	?	?	?	?	?	?	?	1	0	0	0	0	0	0	1	0	?	2	1	1	0	0	0	?	1	0	1	1	0	1
Chenanisuchus_lateroculi	1	?	1	0	?	0	1	0	0	0	1	?	?	0	?	0	2	?	?	?	?	?	?	?	?	?	1	?	?	0	0	?	0	1	0	?	?	1	1	0	0	0	?	1	0	?	?	?	1
Congosaurus_bequaerti	1	?	?	?	?	1	1	0	0	0	2	?	?	2	?	?	?	0	?	?	?	?	?	?	?	?	1	0	0	0	0	-	0	1	0	?	1	0	1	0	0	0	?	0	1	1	1	0	1
Dyrosaurus_maghribensis	1	5	1	0	?	1	1	0	0	0	1	?	?	0	?	0	1	0	0	?	?	?	?	?	?	2	1	0	0	0	0	-	0	1	0	?	?	?	1	0	0	0	?	0	1	?	0	0	0
Dyrosaurus_phosphaticus	1	?	?	0	?	1	1	0	0	0	1	?	?	0	?	0	2	0	?	?	?	?	?	?	?	?	1	0	0	0	0	-	0	1	0	0	1	0	1	0	0	0	?	0	1	?	0	0	1
Guarinisuchus_munizi	1	5	1	0	?	1	1	0	0	0	0	?	?	0	?	1	1	0	0	?	?	?	?	?	?	2	1	0	0	0	0	-	0	1	0	0	1	0	1	0	0	0	?	0	1	?	0	0	?
Hyposaurus_rogersii	1	5	1	0	1	1	1	0	0	0	1	?	?	0	?	1	2	?	?	?	?	?	?	?	?	?	1	?	?	0	0	?	0	1	0	?	?	0	1	0	?	0	?	0	1	?	1	0	0
Phosphatosaurus_gavialoides	?	?	?	?	1	1	0	0	0	0	?	?	?	?	?	1	2	?	?	?	?	?	?	?	?	?	?	?	?	?	?	?	0	1	0	?	1	1	1	0	?	0	?	1	0	1	1	0	1
Rhabdognathus_keiniensis	1	?	?	0	2	1	1	0	0	0	0	?	?	0	?	1	1	?	?	?	?	?	?	?	?	2	?	?	?	0	?	?	?	?	?	?	?	?	?	?	?	?	?	?	?	?	?	?	?
Rhabdognathus_aslerensis	1	5	1	0	?	?	1	0	0	0	0	?	?	0	?	1	1	0	0	?	?	?	1	?	?	2	?	?	?	0	0	?	?	?	?	?	?	?	?	?	?	?	?	?	?	?	?	?	?
Sabinosuchus_coahuilensis	?	?	?	?	0	1	?	0	0	0	0	?	?	2	?	?	?	?	?	?	?	?	?	?	?	?	?	?	?	?	?	?	?	?	?	?	?	?	?	?	?	?	?	?	?	?	?	?	?
Sokotosuchus_ianwilsoni	?	?	?	?	2	1	0	0	0	0	1	?	?	1	?	1	2	0	?	?	?	?	?	?	?	?	?	?	?	?	?	?	0	1	0	?	1	1	1	?	?	0	?	1	0	1	1	0	1
Bernissartia_fagesii	1	1	0	1	?	0	0	0	0	0	1	?	?	?	?	0	2	0	0	?	?	?	?	?	1	2	1	?	?	0	0	?	0	0	0	?	?	0	1	0	0	0	?	?	0	?	0	0	?
Koumpiodontosuchus_aprosdokiti	1	1	0	?	?	0	0	0	0	0	1	?	?	1	?	0	2	0	0	?	?	?	?	?	?	2	1	1	1	0	0	?	0	0	0	0	?	?	1	0	?	?	?	?	?	?	0	0	0
Susisuchus_anatoceps	1	1	0	1	?	0	0	0	0	0	1	?	?	0	?	0	2	?	?	?	?	?	?	?	?	?	1	?	1	0	0	-	0	1	4	0	?	?	1	0	0	?	?	?	?	?	?	?	1
Isisfordia_duncani	1	1	0	1	?	0	0	0	0	0	1	?	?	0	?	0	2	0	0	?	?	?	?	?	?	2	?	?	?	0	?	-	0	1	4	0	0	?	1	0	0	0	?	?	?	0	0	0	1
Pietraroiasuchus_ormezzanoi	1	?	?	1	?	0	0	0	0	0	?	?	?	0	?	0	2	0	0	?	?	?	?	?	?	?	1	?	?	0	?	?	0	1	?	0	0	0	1	0	0	1	?	0	0	?	0	0	2
Pachycheilosuchus_trinquei	?	?	?	?	?	?	?	?	?	?	?	?	?	?	?	?	?	0	?	?	?	?	?	?	?	?	?	?	?	?	?	?	?	?	?	?	?	?	?	?	?	?	?	?	?	?	?	?	?
Iharkutosuchus_makadii	1	?	?	1	2	0	0	0	0	0	1	?	?	0	?	0	2	0	0	?	?	?	?	?	1	2	?	?	?	?	0	?	0	0	0	?	0	0	1	0	0	1	?	0	0	0	0	0	2
Gavialis_gangeticus	1	1	0	1	?	1	1	0	0	1	1	?	?	0	?	0	2	0	0	0	0	0	1	1	1	2	1	0	0	0	0	-	0	1	0	0	0	0	1	0	0	1	?	0	0	?	0	0	0
Crocodylus_porosus	1	1	0	1	2	0	0	0	0	0	1	?	?	0	?	0	2	0	0	0	0	0	1	1	1	2	1	0	0	0	0	1	0	1	0	0	0	0	1	0	0	1	?	0	0	?	0	0	2
Crocodylus_niloticus	1	1	0	1	2	0	0	0	0	0	1	?	?	0	?	0	2	0	0	0	0	0	1	1	1	2	1	0	0	0	0	1	0	1	0	0	0	0	1	0	0	1	?	0	0	?	0	0	2
Alligator_mississippiensis	1	1	0	1	2	0	0	0	0	0	1	?	?	0	?	0	2	0	0	0	0	0	1	1	1	2	1	0	0	0	0	1	0	1	0	0	0	0	1	0	0	1	?	0	0	0	0	0	2
Steneosaurus_gracilirostris	1	0	0	0	0	2	1	0	0	0	3	1	1	0	0	0	2	?	?	?	?	?	0	?	0	?	0	1	1	0	0	-	0	1	1	?	0	0	1	0	1	0	1	0	0	?	-	0	0
Mysteriosaurus_laurillardi	1	?	?	?	1	0	1	0	0	0	3	?	?	0	?	?	?	?	?	?	?	?	?	?	?	?	1	1	1	0	0	-	0	0	1	1	0	0	1	0	1	0	0	0	0	?	-	1	1
Chinese_teleosauroid	1	3	1	0	1	0	1	0	0	0	0	0	0	0	0	0	2	0	0	1	1	?	?	2	?	2	0	1	1	0	0	-	0	0	1	1	0	0	1	0	1	0	0	0	0	0	-	1	0
Indosinosuchus_potamosiamensis	1	4	0	0	1	2	1	0	0	1	0	1	1	0	0	0	2	0	0	?	?	?	?	2	0	2	0	1	1	0	0	-	0	0	1	1	0	0	1	0	1	0	1	0	0	0	-	1	0
Indosinosuchus_sp	1	4	0	0	?	2	1	0	0	0	0	?	?	0	0	0	2	?	?	?	?	?	?	?	?	?	0	1	1	0	0	-	0	0	1	0	0	0	1	0	1	0	1	0	0	?	-	1	1
Platysuchus_multiscrobiculatus	1	5	0	0	1	2	1	0	0	0	3	0	0	0	0	0	2	0	0	?	?	?	?	2	?	?	0	1	1	0	0	-	0	0	1	?	0	0	1	0	1	0	1	0	0	?	-	1	1
Teleosaurus_cadomensis	1	5	0	0	?	2	1	0	0	1	3	0	0	0	0	0	2	0	0	?	?	?	0	2	0	?	?	?	?	0	0	-	?	0	1	?	0	0	1	?	?	?	?	0	?	?	?	?	?
Mycterosuchus_nasutus	1	4	0	0	0	2	1	0	0	1	3	0	0	0	0	0	2	0	0	?	?	?	?	2	?	?	0	1	1	0	0	-	?	0	1	?	0	0	1	0	1	0	1	0	0	0	-	1	0
Bathysuchus_megarhinus	1	?	?	0	0	2	1	0	0	1	0	1	?	3	1	0	1	0	?	?	?	?	?	?	?	?	0	1	1	0	0	-	0	0	1	1	0	0	1	0	1	0	1	0	0	0	-	1	0
Sericodon_jugleri	?	?	?	?	?	2	?	0	0	1	0	1	1	{13}	1	1	{01}	0	?	?	?	?	?	2	?	?	0	1	1	0	?	-	0	0	{01}	?	0	?	1	0	?	0	?	0	0	0	-	1	0
Aeolodon_priscus	?	?	?	?	0	2	1	0	0	1	0	1	1	1	1	?	?	?	?	?	?	?	?	?	?	?	0	1	1	0	0	-	0	0	1	1	0	0	?	0	?	0	1	0	0	?	-	1	0
Macrospondylus_bollensis	1	0	0	0	{01}	2	1	0	0	0	3	0	1	0	0	0	2	0	0	1	1	?	0	2	?	2	0	1	1	0	0	-	0	1	1	0	0	0	1	0	1	0	1	0	0	0	-	0	1
Steneosaurus_stephani	1	?	?	?	?	?	?	?	0	0	?	0	0	0	0	0	2	0	?	?	?	?	?	?	?	?	?	?	?	?	0	?	?	?	?	?	?	?	?	?	?	?	?	?	?	?	?	?	?
Steneosaurus_baroni	?	?	?	?	?	?	1	0	0	?	3	?	?	?	?	?	?	0	?	?	?	?	?	?	?	?	0	1	1	0	?	-	?	?	1	?	0	?	1	?	?	?	?	0	?	0	?	0	?
Haritomenosuchus_leedsi	1	3	1	0	0	2	1	0	0	0	3	0	{01}	0	1	0	2	0	0	?	?	?	?	2	?	?	0	1	1	0	0	-	0	1	1	0	0	0	1	0	1	0	1	0	0	0	-	0	1
Steneosaurus_megistorhynchus	?	?	?	?	?	2	?	0	0	0	?	?	?	0	1	?	?	0	?	?	?	?	?	?	?	?	?	?	?	?	?	-	?	?	?	?	?	?	?	?	?	?	?	?	?	?	?	?	?
Deslongchampsina_larteti	1	?	?	?	1	2	1	0	0	0	3	0	0	0	1	0	2	0	0	?	?	?	?	2	?	?	0	1	1	0	0	-	0	1	1	0	0	0	1	0	1	0	?	0	0	0	-	0	?
Steneosaurus_heberti	1	3	1	0	1	2	1	0	0	0	3	0	0	0	1	0	2	0	0	?	?	?	?	2	?	2	0	1	1	0	0	-	0	1	1	0	0	0	1	0	1	0	1	0	0	0	-	0	?
Steneosaurus_bouchardi	?	3	1	0	?	2	?	0	0	0	3	?	?	?	?	?	2	0	0	?	?	?	?	?	?	?	?	?	?	?	?	-	?	?	?	?	?	?	?	?	?	?	?	?	?	?	-	?	?
Steneosaurus_rostromajor	?	?	?	?	?	?	1	?	?	?	3	?	?	?	?	?	?	0	?	?	?	?	?	?	?	?	?	?	1	0	?	-	?	?	?	?	?	?	?	?	?	?	?	?	?	?	-	?	?
Steneosaurus_edwardsi	1	3	1	0	1	0	1	0	0	0	3	0	?	0	1	0	2	0	0	?	?	?	?	2	?	?	0	1	1	0	0	-	0	1	1	0	0	0	1	0	1	0	1	0	0	0	-	0	1
Yvridiosuchus_boutilieri	1	3	1	0	1	0	1	0	0	0	3	0	?	0	1	0	2	0	0	?	?	?	?	2	?	?	1	1	1	0	0	-	0	1	1	0	0	0	1	0	1	0	1	0	0	?	-	0	1
Lemmysuchus_obtusidens	1	3	1	0	1	0	1	0	0	0	3	0	0	0	1	0	2	0	0	?	?	?	?	2	?	?	1	1	1	0	0	-	0	1	1	0	0	0	1	0	1	0	1	0	0	0	-	0	1
Machimosaurus_buffetauti	1	3	1	0	1	0	0	0	0	0	3	0	0	0	1	0	2	0	0	?	?	?	?	2	?	?	1	1	1	0	0	0	0	1	1	0	0	0	1	0	1	0	0	0	0	0	-	0	1
Machimosaurus_mosae	1	?	?	0	2	0	0	0	0	0	2	?	?	0	?	0	2	0	0	?	?	?	?	?	?	?	1	1	1	?	0	0	0	1	1	?	0	0	1	0	1	0	0	0	0	0	-	0	?
Machimosaurus_hugii	?	?	?	?	?	0	0	0	0	0	2	?	?	?	?	?	?	0	?	?	?	?	?	?	?	?	?	?	?	0	0	?	?	?	?	?	?	?	?	?	?	?	?	?	?	?	?	?	?
Machimosaurus_rex	?	?	?	?	?	0	0	0	0	0	2	?	?	?	?	?	?	?	0	?	?	?	?	?	?	?	?	?	?	?	0	?	?	?	?	?	?	?	?	?	?	?	?	?	?	?	?	?	?
Pelagosaurus_typus	1	2	1	0	0	2	1	0	0	0	3	?	?	0	?	0	2	0	0	1	1	0	0	2	0	2	0	1	1	0	0	-	0	1	0	0	0	0	1	0	1	?	?	0	0	?	0	0	0
Peipehsuchus_teleorhinus	?	?	?	?	?	?	1	0	0	?	3	?	?	?	?	?	?	?	?	?	?	?	?	?	?	?	?	1	1	?	?	?	0	1	2	?	0	0	1	0	1	0	?	0	0	?	0	0	1
Teleidosaurus_calvadosii	1	3	1	0	?	0	1	0	0	0	3	?	?	0	?	0	2	?	?	?	?	?	?	2	?	?	?	1	1	0	0	-	0	1	2	0	0	0	1	0	1	0	?	0	0	?	0	0	1
Metriorhynchoid_indet_T	1	3	1	0	0	2	1	0	0	0	3	?	?	0	?	0	2	0	0	?	?	?	0	2	0	2	0	1	1	0	0	-	?	?	?	?	?	?	?	?	?	?	?	?	?	?	?	?	?
Magyarosuchus_fitosi	?	?	?	?	?	?	?	?	?	?	?	?	?	?	?	?	?	?	?	?	?	?	?	?	?	?	?	?	?	?	?	?	?	?	?	?	?	?	?	?	?	?	?	?	?	?	?	?	?
Eoneustes_gaudryi	?	?	?	?	?	?	1	0	0	0	3	?	?	0	?	?	?	0	?	?	?	?	?	?	?	?	?	?	?	0	0	?	?	?	?	?	?	?	?	?	?	?	?	?	?	?	?	?	?
Chile_metriorhynchoid	?	?	?	?	?	?	?	?	?	?	?	?	?	0	?	?	?	?	?	?	?	?	?	?	?	?	?	?	?	?	?	?	?	?	?	?	?	?	?	?	?	?	?	?	?	?	?	?	?
Zoneait_nargorum	?	?	?	?	?	?	1	0	?	?	?	?	?	0	?	0	?	?	?	?	?	?	0	?	?	?	?	?	?	?	0	?	?	?	?	?	?	?	?	?	?	?	?	?	?	?	?	?	?
Solnhofen_Cricosaurus	?	?	?	?	?	?	?	0	0	?	2	?	?	?	?	?	?	?	?	?	?	?	?	?	?	?	1	1	1	0	0	-	0	1	3	?	0	-	3	0	1	?	?	0	-	?	0	0	3
Cricosaurus_bambergensis	?	?	?	?	?	?	?	0	?	?	?	?	?	?	?	?	?	?	?	?	?	?	?	?	?	?	?	?	?	?	?	-	?	?	?	?	?	?	?	?	?	?	?	?	?	0	0	0	?
Cricosaurus_elegans	?	?	?	?	?	2	?	0	0	0	2	?	?	0	?	?	?	?	?	?	?	?	?	?	?	?	1	1	1	0	0	-	0	1	3	?	0	-	3	0	?	?	?	0	-	?	0	0	3
Cricosaurus_suevicus	0	3	1	?	?	2	1	0	0	0	2	?	?	0	?	1	0	?	?	?	?	?	?	?	?	?	1	1	1	0	0	-	0	1	3	?	0	-	3	0	1	?	?	0	-	?	0	0	3
Cricosaurus_schroederi	0	3	1	0	?	?	1	0	0	0	0	?	?	3	?	1	0	0	?	?	?	?	?	2	?	?	1	1	1	0	0	-	0	1	?	?	?	?	?	?	?	?	?	?	?	?	?	?	?
Cricosaurus_araucanensis	0	3	1	0	0	2	1	0	0	0	0	?	?	3	?	1	0	0	0	?	1	1	0	2	0	2	1	1	1	0	0	-	0	1	3	0	0	-	3	0	1	?	?	0	-	0	0	0	3
Cricosaurus_vignaudi	?	?	?	?	?	2	1	0	0	0	0	?	?	3	?	1	0	?	?	?	?	?	?	?	?	?	?	?	?	?	?	-	?	?	?	?	?	-	3	0	?	?	?	0	-	?	?	?	3
Cricosaurus_lithographicus	?	?	?	?	?	2	1	0	0	0	0	?	?	3	?	1	0	0	?	?	?	?	?	?	?	2	?	1	1	?	?	-	0	1	3	?	0	-	3	0	1	?	?	0	-	?	0	0	3
Dakosaurus_lissocephalus	?	?	?	0	?	?	?	?	?	?	?	?	?	1	?	1	0	?	?	?	?	?	?	2	?	?	?	?	?	?	?	?	?	?	?	?	?	?	?	?	?	?	?	?	?	?	?	?	?
Cricosaurus_sp_Cuba	1	?	?	0	?	?	?	?	?	?	?	?	?	1	?	?	?	?	?	?	?	?	?	?	?	?	?	?	?	?	?	?	?	?	?	?	?	?	?	?	?	?	?	?	?	?	?	?	?
Rhacheosaurus_gracilis	1	3	1	0	?	2	1	0	0	0	2	?	?	?	?	?	?	?	?	?	?	?	?	2	?	?	1	?	1	0	0	-	0	1	3	?	0	-	3	0	?	?	?	0	-	?	?	0	3
Metriorhynchidae_indet_Cuba	1	?	?	?	?	?	1	0	?	?	?	?	?	?	?	?	?	?	?	?	?	?	?	?	?	?	?	?	?	?	?	?	?	?	?	?	?	?	?	?	?	?	?	?	?	?	?	?	?
Cricosaurus_macrospondylus	?	?	?	?	?	?	1	0	0	?	2	?	?	3	?	1	?	?	?	?	?	?	?	?	?	?	?	1	1	0	0	-	0	1	3	?	0	-	3	0	?	?	?	0	-	?	0	0	3
Cricosaurus_saltillensis	?	?	?	?	?	0	?	0	0	0	2	?	?	3	?	1	?	?	?	?	?	?	?	?	?	?	?	?	?	0	?	-	0	1	3	?	0	-	3	0	?	?	?	0	-	?	0	0	?
Metriorhynchus_palpebrosus	1	3	1	0	?	2	1	0	0	0	2	?	?	?	?	?	1	0	?	?	?	?	?	2	?	?	?	?	?	0	0	-	0	1	3	?	0	-	3	0	?	?	?	0	-	0	0	0	?
Maledictosuchus_nuyivijanan	?	?	?	?	?	?	?	0	0	?	2	?	?	?	?	?	?	0	?	?	?	1	?	?	?	?	?	?	1	0	0	-	?	?	?	?	?	?	?	?	?	?	?	?	?	?	?	?	?
Maledictosuchus_riclaensis	1	3	1	?	?	2	1	0	0	0	2	?	?	2	?	?	1	0	?	?	?	?	?	?	?	?	1	1	1	0	0	-	0	1	3	?	0	-	2	0	?	?	?	0	-	0	0	0	1
Gracilineustes_acutus	?	?	?	?	?	2	1	0	0	0	?	?	?	3	?	?	?	?	?	?	?	?	?	?	?	?	?	?	?	?	?	-	?	1	3	?	?	0	2	?	?	?	?	0	0	?	0	?	0
Gracilineustes_leedsi	1	3	1	0	0	2	1	0	0	0	0	?	?	3	?	1	0	0	?	?	?	?	?	2	0	2	1	1	1	0	0	-	0	1	3	?	0	0	2	0	1	0	?	0	0	0	0	0	1
Metriorhynchus_geoffroyii	?	?	?	?	?	?	1	0	0	?	?	?	?	?	?	?	?	?	?	?	?	?	?	?	?	?	1	1	1	?	0	?	0	1	3	?	0	0	2	0	1	0	?	0	0	0	0	0	1
Metriorhynchus_superciliosus	1	3	1	0	1	2	1	0	0	0	3	?	?	0	?	0	1	0	0	?	1	1	?	2	0	2	1	1	1	0	0	-	0	1	3	0	0	0	2	0	1	0	?	0	0	0	0	0	1
Metriorhynchus_casamiquelai	?	?	?	0	1	0	0	0	0	0	0	?	?	3	?	?	0	0	0	?	?	?	?	2	?	2	?	?	?	0	0	0	0	1	3	0	?	0	2	0	1	?	?	0	0	?	0	?	2
Metriorhynchus_westermanni	?	?	?	?	?	?	?	?	0	0	?	?	?	3	?	?	?	?	?	?	?	?	0	?	?	2	?	?	?	?	?	?	?	?	?	?	?	?	?	?	?	?	?	?	?	?	?	?	?
Neptunidraco_ammoniticus	?	?	?	?	?	?	0	?	?	?	?	?	?	?	?	?	?	?	?	?	?	?	?	?	?	?	?	?	?	?	?	?	?	?	?	?	?	?	?	?	?	?	?	?	?	?	?	?	?
Metriorhynchus_brachyrhynchus	1	3	1	0	{12}	0	0	0	0	0	3	?	?	0	?	0	1	0	0	?	?	?	?	2	0	2	1	1	1	0	0	0	0	1	3	0	0	0	2	0	1	0	?	0	0	0	0	0	1
Tyrannoneustes_lythrodectikos	1	3	1	0	?	0	0	0	0	0	3	?	?	0	?	0	1	0	?	?	?	?	?	?	0	?	1	1	1	0	0	-	0	1	3	0	0	0	2	0	1	?	?	0	0	0	?	0	?
Swiss_hastifer	?	?	?	?	?	?	?	?	?	?	2	?	?	?	?	?	?	?	?	?	?	?	?	?	?	?	1	?	1	?	?	?	0	1	3	?	0	0	2	0	1	0	?	0	0	0	0	0	1
Chouquet_hastifer	?	?	?	?	?	0	0	0	0	0	2	?	?	2	?	?	?	0	?	?	?	?	?	?	?	?	?	?	?	?	?	?	0	1	3	?	0	0	2	0	1	?	?	0	0	?	0	0	2
Mr_Passmores_specimen	?	?	?	0	?	0	0	0	0	0	3	?	?	2	?	?	?	?	?	?	?	?	?	?	?	?	1	?	1	?	0	?	0	1	3	?	0	0	2	0	?	0	?	0	0	?	0	?	?
cf_Torvoneustes_MANCH_J6459	?	?	?	?	?	?	0	0	0	?	2	?	?	2	?	?	?	?	?	?	?	?	?	?	?	?	?	?	?	?	?	?	?	?	?	?	?	?	?	?	?	?	?	?	?	?	?	?	?
Torvoneustes_coryphaeus	1	3	1	0	?	?	?	?	?	0	2	?	?	2	?	1	0	0	?	?	?	?	?	2	?	?	?	?	?	0	0	?	?	?	?	?	?	?	?	?	?	?	?	?	?	?	?	?	?
Torvoneustes_carpenteri	?	?	?	?	?	0	0	0	0	0	2	?	?	3	?	1	0	0	?	?	?	?	?	?	?	?	?	?	?	0	0	?	0	?	3	?	0	0	2	?	1	0	?	0	0	?	0	?	1
Torvoneustes_mexicanus	?	?	?	?	?	?	?	?	?	?	?	?	?	?	?	?	?	?	?	?	?	?	?	?	?	?	?	?	?	?	?	?	?	?	?	?	?	?	?	?	?	?	?	?	?	?	?	?	?
Torvoneustes_sp_SEC_K1707	?	?	?	?	?	?	?	?	?	?	?	?	?	?	?	?	?	?	?	?	?	?	?	?	?	?	?	?	?	?	?	?	?	?	?	?	?	?	?	?	?	?	?	?	?	?	?	?	?
Purranisaurus_potens	1	3	1	0	?	?	?	0	0	0	?	?	?	?	?	?	?	0	0	?	?	?	?	2	0	2	?	?	?	0	0	?	?	?	?	?	?	?	?	?	?	?	?	?	?	?	?	?	?
Ieldraan_melkshamensis	?	?	?	?	?	?	?	?	0	?	1	?	?	0	?	?	?	?	?	?	?	?	?	?	?	?	?	?	?	?	0	0	?	?	?	?	?	?	?	?	?	?	?	?	?	?	?	?	?
Geosaurus_giganteus	?	?	?	?	?	0	?	?	0	?	1	?	?	3	?	?	?	?	0	?	?	?	?	?	?	?	1	1	1	0	0	0	0	?	3	?	0	0	2	?	?	?	?	?	0	?	?	?	2
Geosaurus_grandis	?	3	1	0	?	0	0	0	0	0	1	?	?	3	?	?	1	?	?	?	?	?	?	?	?	?	1	1	1	0	0	0	0	1	3	?	0	0	2	0	?	0	?	?	0	?	0	0	2
Geosaurus_lapparenti	?	?	?	?	?	?	?	?	?	?	?	?	?	3	?	?	?	?	?	?	?	?	?	?	?	?	?	?	?	?	?	?	?	?	?	?	?	?	?	?	?	?	?	?	?	?	?	?	?
Suchodus_durobrivensis	1	3	1	0	?	0	0	0	0	0	2	?	?	0	?	0	1	0	?	?	?	?	?	2	?	?	1	?	?	?	0	0	0	?	3	?	0	?	2	?	?	?	?	?	?	?	?	?	?
Plesiosuchus_manselii	1	3	1	0	?	0	0	0	0	0	2	?	?	1	?	?	?	0	?	?	?	?	?	2	?	2	1	?	?	0	0	0	0	1	3	0	0	0	2	0	1	0	?	0	0	0	0	0	2
Dakosaurus_andiniensis	0	3	1	0	?	0	2	1	0	0	0	?	?	3	?	1	?	0	0	?	1	?	?	?	?	?	1	1	1	0	0	0	0	1	3	0	0	0	3	0	?	?	?	?	?	?	0	0	2
Dakosaurus_maximus	?	3	1	?	?	0	0	1	0	0	3	?	?	1	?	1	?	0	?	?	?	?	?	?	?	?	1	1	1	0	0	0	0	1	3	?	0	0	3	0	1	0	?	?	?	?	0	0	2
Mr_Leeds_dakosaur	1	3	1	0	?	0	0	1	0	0	3	?	?	0	?	0	1	0	?	?	?	?	?	2	0	?	1	1	1	0	0	0	0	1	3	?	0	0	?	?	?	0	?	0	0	?	0	0	2
Vaches_Noire_dakosaur	?	?	?	?	?	?	?	1	0	0	3	?	?	0	?	?	?	?	?	?	?	?	?	?	?	?	?	?	?	0	0	?	?	?	?	?	?	?	?	?	?	?	?	?	?	?	?	?	?
Other OTUs
Cassissuchus_sanziuami	0	?	?	?	?	0	2	0	0	?	0	0	0	2	?	?	?	?	?	?	?	?	2	0	?	?	?	?	?	0	0	0	?	0	0	1	0	?	0	0	0	0	0	0	1	1	0	0	0
Separate Eoneustes OTUs
Eoneustes_bathonicus	?	?	?	?	?	?	1	0	0	0	3	0	?	?	?	?	?	?	?	?	?	?	?	?	?	?	?	0	?	?	?	?	?	?	?	?	?	?	?	?	?	?	?	?	?	?	?	?	?
Eoneustes_gaudryi	?	?	?	?	?	?	1	0	0	0	3	0	?	?	0	?	?	?	?	?	?	?	?	?	?	?	0	0	?	?	?	?	?	?	?	?	?	?	?	?	?	?	?	?	?	?	?	?	?
Separate Mystriosaurus OTUs
Steneosaurus_brevior	1	?	?	?	1	0	1	0	0	0	3	0	?	?	?	?	?	?	?	?	?	?	?	1	1	1	0	0	-	0	0	1	1	0	0	1	0	1	0	0	0	?	0	1	1	1	0	0	0
Mystriosaurus_laurillardi	?	?	?	?	?	0	1	0	0	?	3	?	?	?	?	?	?	?	?	?	?	?	?	1	1	1	0	?	-	0	0	1	1	0	0	1	0	1	0	0	0	?	0	1	1	1	0	0	0
Pelagosaurus_typus_old	1	2	1	0	0	2	1	0	0	0	3	0	0	2	0	0	1	1	0	0	2	0	2	0	1	1	0	0	-	0	1	0	0	0	0	1	0	1	?	0	0	?	0	0	0	1	?	0	0
Fragmentary OTUs:
Redondavenator_quayensis	?	?	?	?	?	?	?	0	?	?	1	?	?	?	0	?	?	?	?	?	?	?	?	0	?	?	?	?	?	0	0	0	?	0	0	1	0	?	?	0	0	0	0	0	0	1	0	0	0
Sinemurian_taxon	?	?	?	?	?	?	?	0	0	?	3	?	?	?	0	?	?	?	?	?	?	?	?	?	?	?	?	?	?	?	?	?	?	?	?	?	?	?	?	?	?	?	?	?	?	?	?	?	?
Pascal OTUs:
Druegendorf_croc	?	?	?	?	?	?	?	?	?	?	?	?	?	?	?	?	?	?	?	?	?	?	?	?	?	?	?	?	?	?	?	?	?	?	?	?	?	?	?	?	?	?	?	?	?	?	?	?	?
Malm_beta_dentary_(SMNS_80149)	?	?	?	?	?	?	?	?	?	?	?	?	?	?	?	?	?	?	?	?	?	?	?	?	?	?	?	?	?	?	?	?	?	?	?	?	?	?	?	?	?	?	?	?	?	?	?	?	?
Druegendorf+SMNS_80149	?	?	?	?	?	?	?	?	?	?	?	?	?	?	?	?	?	?	?	?	?	?	?	?	?	?	?	?	?	?	?	?	?	?	?	?	?	?	?	?	?	?	?	?	?	?	?	?	?
PREVIOUS TELEOSAUROID DATA
Steneosaurus_gracilirostris	1	0	0	0	0	2	1	0	0	0	3	?	?	0	?	0	2	?	?	1	1	?	0	?	0	?	0	1	1	0	0	-	0	1	1	?	0	0	1	0	1	0	?	0	0	?	0	0	{01}
Mystriosaurus_laurillardi	1	?	?	?	1	0	1	0	0	0	3	?	?	0	?	?	?	?	?	?	?	?	?	?	?	?	1	1	1	0	0	-	0	0	1	1	0	0	1	0	1	0	?	0	0	?	0	1	1
Chinese_teleosauroid	1	3	1	0	1	0	1	0	0	0	0	?	?	0	?	0	2	0	0	1	1	?	?	2	?	2	?	1	1	0	0	-	0	0	1	1	0	0	1	0	1	0	?	0	0	0	0	1	0
Platysuchus_multiscrobiculatus	1	5	0	0	1	2	1	0	0	0	3	?	?	0	?	0	2	?	0	?	?	?	?	2	?	?	0	1	1	0	0	-	0	0	1	?	0	0	1	0	1	0	?	0	0	?	?	1	1
Teleosaurus_cadomensis	1	5	0	0	?	2	1	0	0	1	3	?	?	0	?	0	2	0	0	?	?	?	0	2	0	?	?	?	?	0	0	-	?	0	1	?	0	0	1	0	?	?	?	0	?	?	?	?	1
Mycterosuchus_nasutus	1	3	1	0	0	2	1	0	0	1	3	?	?	0	?	0	2	0	0	?	?	?	?	2	?	?	1	1	1	0	0	-	0	0	1	?	0	0	1	0	1	0	?	0	0	0	0	1	?
Teleosaurus_megarhinus	?	?	?	?	0	2	1	0	0	1	0	?	?	3	?	0	1	0	?	?	?	?	?	?	?	?	1	1	1	0	0	-	0	0	1	1	0	0	1	0	1	0	?	0	0	0	0	1	0
Steneosaurus_bollensis	1	0	0	0	{01}	2	1	0	0	0	3	?	?	0	?	0	2	0	0	1	1	?	0	2	?	2	0	1	1	0	0	-	0	1	1	0	0	0	1	0	1	0	?	0	0	0	0	0	1
Steneosaurus_leedsi	1	3	1	0	0	2	1	0	0	0	3	?	?	0	?	0	2	0	0	?	?	?	?	2	?	?	0	1	1	0	0	-	0	1	1	0	0	0	1	0	1	0	?	0	0	0	0	0	1
Aeolodon_priscus	?	?	?	?	0	2	1	0	0	1	0	?	?	0	?	1	?	?	?	?	?	?	?	?	?	?	?	?	?	?	0	-	0	?	1	1	0	0	?	0	?	?	?	0	0	?	?	?	1
Steneosaurus_larteti	1	?	?	?	1	2	1	0	0	0	3	?	?	0	?	0	2	0	0	?	?	?	?	2	?	?	0	1	1	0	0	-	0	1	1	0	0	0	1	0	1	0	?	0	0	0	0	0	?
Steneosaurus_heberti	1	3	1	0	1	2	1	0	0	0	3	?	?	0	?	0	2	0	0	?	?	?	?	2	?	2	0	1	1	0	0	-	0	1	1	0	0	0	1	0	1	0	?	0	0	0	0	0	?
Steneosaurus_edwardsi	1	3	1	0	1	0	1	0	0	0	3	?	?	0	?	0	2	0	0	?	?	?	?	2	?	?	0	1	1	0	0	-	0	1	1	0	0	0	1	0	1	0	?	0	0	0	0	0	1
Lemmysuchus_obtusidens	1	3	1	0	1	0	1	0	0	0	3	?	?	0	?	0	2	0	0	?	?	?	?	2	?	?	1	1	1	0	0	-	0	1	1	0	0	0	1	0	1	0	?	0	0	0	0	0	1
Machimosaurus_buffetauti	1	3	1	0	1	0	0	0	0	0	3	?	?	0	?	0	2	0	0	?	?	?	?	2	?	?	1	1	1	0	0	0	0	1	1	0	0	0	1	0	1	0	?	0	0	0	0	0	1
Machimosaurus_mosae	1	?	?	0	2	0	0	0	0	0	2	?	?	0	?	0	2	0	0	?	?	?	?	?	?	?	1	1	1	?	0	0	0	1	1	?	0	0	1	0	1	0	?	0	0	0	0	0	?
Machimosaurus_hugii	?	?	?	?	?	0	0	0	0	0	2	?	?	?	?	?	?	?	?	?	?	?	?	?	?	?	1	?	?	?	0	?	?	?	?	?	?	?	?	0	?	?	?	?	?	?	?	?	?
EXCLUDED
Geosaurine_indet_Argentina	?	?	?	?	?	?	?	?	?	?	?	?	?	0	?	?	?	?	?	?	?	?	?	?	?	?	?	?	?	?	?	?	?	?	?	?	?	?	?	?	?	?	?	?	?	?	?	?	?
Metriorhynchus_hastifer	?	?	?	?	?	0	0	0	0	0	2	0	1	2	0	?	?	0	?	?	?	?	?	?	?	?	?	?	?	?	?	?	?	?	?	?	?	?	2	?	?	?	?	0	?	?	?	?	?
Pelagosaurus_tomarensis	1	3	1	0	0	2	1	0	0	0	2	?	?	1	?	0	1	0	?	?	?	?	?	2	0	2	?	1	1	0	0	-	?	?	?	?	?	?	?	?	?	?	?	?	?	?	?	?	?
Sinemurian_taxon	?	?	?	?	?	?	?	0	0	?	3	?	?	?	?	?	?	0	?	?	?	?	?	?	?	?	?	?	?	?	?	?	?	?	?	?	?	?	?	?	?	?	?	?	?	?	?	?	?
Dorchester_hastifer	1	?	?	?	?	0	?	0	0	0	2	0	1	2	0	0	?	0	?	?	?	?	?	?	?	?	1	1	1	0	?	?	0	1	3	?	0	0	2	0	1	0	1	0	0	0	0	0	1
Undescribed_sphenosuchian	0	?	0	0	?	?	2	?	?	?	?	?	?	2	?	1	?	?	?	0	0	?	0	?	?	1	?	?	?	?	?	?	?	?	?	?	?	?	?	?	?	?	?	?	?	?	?	?	?
[truncated: 453 more columns]

## Sheet: Dec MonMat with qm
Taxa	1	2	3	4	5	6	7	8	9	10	11	12	13	14	15	16	17	18	19	20	21	22	23	24	25	26	27	28	29	30	31	32	33	34	35	36	37	38	39	40	41	42	43	44	45	46	47	48	49
Postosuchus_kirkpatricki	0	?	?	0	?	0	2	?	0	0	?	?	?	2	?	?	?	?	0	?	?	?	?	0	0	1	0	1	1	0	0	0	0	0	0	?	0	?	1	0	0	0	?	0	0	?	0	0	3
Carnufex_carolinensis	0	?	?	?	?	0	2	0	0	?	1	?	0	?	?	?	?	?	?	?	?	?	?	?	?	?	0	?	1	0	0	0	0	0	0	?	0	0	1	0	?	?	?	0	0	?	0	0	1
Dromicosuchus_grallator	?	?	?	0	?	0	2	0	0	0	0	?	?	2	?	1	?	?	?	?	?	?	?	0	?	?	0	?	0	0	?	?	0	0	?	?	0	0	1	0	0	0	?	0	0	?	0	0	0
Hesperosuchus_cf_agilis	?	?	?	0	?	0	2	0	0	0	0	?	?	2	?	1	?	?	?	?	?	?	?	0	?	1	0	?	0	0	?	?	0	0	0	?	0	0	1	0	0	0	?	0	0	?	0	0	0
Dibothrosuchus_elaphros	0	0	0	0	?	0	2	0	0	0	0	?	?	?	?	?	?	0	0	?	?	?	?	0	?	1	0	?	1	?	?	?	?	0	0	0	0	?	?	?	?	0	?	0	0	0	0	0	3
Terrestrisuchus_gracilis	0	0	0	0	?	0	2	?	0	0	0	?	?	2	?	?	?	0	?	?	?	?	?	0	?	?	0	?	?	?	?	?	?	0	0	?	0	?	?	?	?	?	?	0	0	?	?	?	?
Junggarsuchus_sloani	0	0	0	0	?	0	2	0	0	0	0	?	?	2	?	1	0	0	0	?	?	?	?	0	?	?	0	1	1	0	0	0	0	0	0	0	0	0	1	0	0	0	?	0	0	?	0	0	0
Eopneumatosuchus_colberti	1	?	?	?	?	?	?	?	0	0	?	?	?	0	?	0	2	?	?	?	0	?	1	?	?	2	?	?	?	?	?	?	?	?	?	?	?	?	?	?	?	?	?	?	?	?	?	?	?
Hemiprotosuchus_leali	0	0	0	0	?	0	2	0	0	0	?	?	?	?	?	0	2	?	1	?	?	?	1	0	?	?	0	?	?	0	?	0	0	0	0	?	?	?	1	0	0	0	?	0	?	?	0	0	?
Protosuchus_richardsoni	0	0	0	0	?	0	2	0	0	1	1	?	?	0	?	0	2	1	1	?	?	0	1	?	?	2	0	1	1	0	0	0	0	0	0	0	0	?	1	0	0	0	?	0	0	?	0	0	0
Protosuchus_haughtoni	0	0	0	0	?	0	2	0	0	1	1	?	?	0	?	0	2	1	1	?	?	?	?	0	?	2	0	1	1	0	0	0	0	0	0	?	0	?	1	0	0	0	?	0	0	?	0	0	0
Fruitachampsa_callisoni	1	0	?	?	?	0	0	0	0	0	1	?	?	0	?	0	2	1	?	?	?	?	?	0	?	?	0	?	?	0	?	0	0	0	0	?	?	?	1	0	0	0	?	?	?	?	?	?	?
Mariliasuchus_amarali	1	4	0	0	?	0	2	?	0	0	2	?	?	0	?	0	?	0	0	?	?	0	?	0	?	2	0	1	1	0	0	0	0	0	5	0	?	?	0	0	0	?	?	?	?	?	?	?	0
Notosuchus_terrestris	1	4	0	0	?	0	2	?	0	0	2	?	?	0	?	0	2	0	0	?	?	0	1	0	?	2	0	1	1	0	0	0	0	0	5	0	?	0	0	0	0	?	?	?	?	?	?	?	0
Adamantinasuchus_navae	0	?	?	?	?	0	2	?	0	0	2	?	?	0	?	0	?	?	?	?	?	?	?	0	?	?	0	1	1	0	0	0	0	0	5	?	?	?	1	0	0	?	?	?	?	?	0	0	0
Sphagesaurus_huenei	0	{04}	0	0	?	0	2	?	0	0	2	?	?	0	?	0	?	0	?	?	?	?	?	?	?	2	0	1	1	0	0	?	0	0	5	?	?	?	1	0	0	?	?	?	?	?	0	0	0
Caipirasuchus_montealtensis	0	{04}	0	0	?	0	2	?	0	0	2	?	?	0	?	0	?	1	0	?	?	?	?	0	1	2	0	1	1	0	0	0	0	0	5	?	?	?	1	0	0	?	?	?	?	?	0	0	0
Baurusuchus_pachecoi	0	4	0	0	?	0	2	0	0	0	2	?	?	0	?	0	?	1	0	?	?	?	1	?	?	2	0	1	1	0	0	0	0	0	5	0	0	0	0	0	0	0	?	0	0	?	0	0	0
Araripesuchus_patagonicus	1	0	0	0	?	0	2	0	0	0	1	?	?	0	?	0	2	0	0	?	?	?	?	1	?	2	0	?	?	?	0	0	?	0	?	?	?	?	?	0	0	?	?	?	?	?	?	?	?
Montealtosuchus_arrudacamposi	0	0	0	0	?	0	2	0	0	0	1	?	?	0	?	0	2	0	0	?	?	?	?	1	?	2	?	1	0	0	0	0	0	0	5	?	0	0	1	0	0	0	?	0	0	0	0	0	0
Uberabasuchus_terrificus	0	4	0	0	?	0	2	0	0	0	1	?	?	0	?	0	?	0	0	?	?	?	?	?	?	?	0	1	0	0	0	0	0	0	5	0	0	0	1	0	0	0	?	0	0	?	0	0	0
cf_Hamadasuchus_rebouli	0	5	0	0	?	0	2	0	0	0	1	?	?	0	?	0	2	0	0	?	0	?	1	1	1	2	0	0	0	0	0	0	0	0	0	?	0	0	1	0	0	0	?	0	0	0	0	0	0
Sebecus_icaeorhinus	0	5	0	0	?	?	2	0	0	0	1	?	?	0	?	0	?	0	?	?	?	?	1	1	?	2	0	0	0	0	0	0	0	?	0	?	?	?	1	0	?	?	?	?	?	?	?	?	0
Mahajangasuchus_insignis	1	?	?	0	?	?	0	0	0	0	1	?	?	0	?	0	2	0	0	?	?	?	1	?	1	?	?	?	1	0	0	0	0	?	0	?	?	?	1	?	0	?	?	?	?	0	?	?	?
Alligatorium_meyeri	?	?	?	?	?	0	0	0	0	0	1	?	?	0	?	0	2	?	?	?	?	?	?	?	?	?	1	1	1	0	0	0	0	1	0	?	0	0	1	0	0	?	?	0	0	?	0	0	?
Theriosuchus_pusillus	1	{12}	?	1	?	0	0	0	0	0	1	?	?	0	?	0	2	0	0	?	?	?	1	1	1	2	1	?	1	0	0	0	0	1	0	0	0	0	1	0	0	?	?	0	0	?	0	0	2
Eutretauranosuchus_delfsi	1	1	0	1	?	0	0	0	0	0	1	?	?	0	?	0	2	0	0	?	?	?	?	?	?	2	1	?	1	0	1	0	0	1	0	?	0	?	?	?	0	?	?	?	?	?	0	0	?
Amphicotylus_stovalli	1	2	1	1	?	0	0	0	0	0	1	?	?	0	?	0	2	0	0	?	?	?	?	?	?	2	1	?	?	0	1	?	1	1	0	?	0	0	1	1	0	?	?	?	0	1	1	?	?
Goniopholis_baryglphaeus	1	?	?	?	?	0	0	0	0	0	1	?	?	0	?	0	2	0	0	?	?	?	?	?	?	?	1	?	1	0	1	0	1	1	?	?	0	?	1	1	0	?	?	0	0	?	?	?	0
Goniopholis_kiplingi	1	2	1	1	?	0	0	0	0	0	1	?	?	0	?	0	2	0	?	?	?	0	?	?	1	2	1	1	1	0	1	?	1	1	0	0	0	0	1	1	0	0	?	?	0	?	1	-	0
Goniopholis_simus	1	2	1	1	?	0	0	0	0	0	1	?	?	0	?	0	2	0	0	?	?	?	?	?	1	2	1	1	1	0	1	0	1	1	0	?	0	?	1	1	0	0	?	0	0	?	?	-	0
Anteophthalmosuchus_hooleyi	1	2	1	1	?	0	0	0	0	0	1	?	?	0	?	0	2	0	0	?	?	?	?	?	?	2	1	?	1	0	1	0	?	?	?	?	?	?	?	?	?	?	?	?	?	?	?	?	?
Anteophthalmosuchus_epikrator	1	2	1	1	?	0	0	0	0	0	1	?	?	0	?	0	2	0	?	?	?	?	?	?	1	2	1	1	1	0	1	0	1	1	0	?	0	0	1	?	0	0	?	0	0	1	1	-	?
Elosuchus_cherifiensis	1	2	1	1	?	1	1	0	0	0	3	?	?	0	?	0	2	0	0	?	?	?	?	?	?	2	1	1	?	0	0	?	0	1	0	?	?	0	?	0	0	0	?	0	0	2	2	-	?
Elosuchus_broinae	1	2	1	1	?	1	1	0	0	0	3	?	?	0	?	0	2	0	0	?	?	?	?	?	?	2	1	1	?	0	0	?	0	1	0	?	0	0	1	0	0	0	?	0	0	2	2	-	0
Vectisuchus_leptognathus	1	{12}	?	1	?	0	1	0	0	0	3	?	?	0	?	0	2	?	0	?	?	?	?	?	?	2	1	?	1	0	0	-	0	1	0	?	?	?	1	?	0	?	?	?	?	?	?	?	?
Pholidosaurus_schaumburgensis	1	0	1	1	?	1	1	0	0	0	1	?	?	0	?	0	2	0	0	?	?	?	1	?	?	2	1	?	?	0	0	-	?	?	?	?	?	?	?	?	?	?	?	0	?	?	?	?	?
Pholidosaurus_sp_Charente	1	2	1	1	2	1	1	0	0	0	3	?	?	0	?	0	2	0	0	?	?	?	?	?	?	2	1	?	?	?	0	-	0	1	0	?	0	0	1	0	0	0	?	0	0	1	1	-	0
Meridiosaurus_vallisparadisi	?	?	?	?	?	2	1	0	0	?	3	?	?	?	?	?	?	0	?	?	?	?	?	?	?	?	1	1	1	?	?	?	0	1	0	?	0	0	1	0	0	1	?	0	0	1	1	-	1
Chalawan_thailandicus	1	?	?	?	?	1	0	0	1	0	?	?	?	?	?	0	2	0	?	?	?	?	?	?	?	?	1	?	?	?	?	?	0	1	?	?	?	?	1	?	?	1	?	0	0	?	2	-	1
Sarcosuchus_hartti	?	?	?	?	?	?	?	?	1	?	?	?	?	?	?	?	?	?	?	?	?	?	?	?	?	?	1	?	?	?	?	0	?	?	?	?	?	?	?	?	?	?	?	0	?	?	?	?	?
Sarcosuchus_imperator	1	2	1	1	?	1	0	0	1	0	1	?	?	0	?	0	2	0	0	?	?	?	?	?	?	2	1	?	?	0	0	0	0	1	0	?	0	0	1	0	0	1	?	0	0	1	2	-	1
cf_Terminonaris_robusta	1	?	?	0	?	1	1	0	0	0	1	?	?	0	?	0	2	?	0	?	?	?	?	?	?	?	1	?	1	?	0	-	0	1	0	?	0	0	1	0	?	1	?	0	1	1	2	-	1
Oceanosuchus_boecensis	1	?	1	?	?	1	1	0	0	?	1	?	?	0	?	0	2	?	?	?	?	?	?	?	?	2	1	?	1	0	0	0	0	1	0	?	0	0	1	0	?	1	?	0	0	1	2	-	0
Pholidosaurus_purbeckensis	1	1	1	1	?	1	1	0	0	0	3	?	?	0	?	0	1	0	0	?	?	?	?	1	?	2	1	?	?	?	0	-	?	?	?	?	?	?	?	?	?	?	?	?	?	?	?	?	?
Fortignathus_felixi	?	?	?	?	?	{12}	?	?	0	?	?	?	?	?	?	?	?	?	?	?	?	?	?	?	?	?	1	?	?	?	?	0	?	?	?	?	?	?	?	?	?	?	?	?	?	?	?	?	?
Acherontisuchus_guajiraensis	?	?	?	?	?	1	1	?	0	?	0	?	?	?	?	?	?	?	?	?	?	?	?	?	?	?	1	?	?	?	?	0	?	?	?	?	?	?	?	?	?	?	?	?	?	?	?	?	?
Anthracosuchus_balrogus	1	?	?	0	2	0	0	0	0	0	1	?	?	0	?	0	2	0	0	?	?	?	?	?	?	?	1	?	?	0	?	?	0	1	1	?	1	1	1	0	0	0	?	1	0	1	1	0	2
Arambourgisuchus_khouribgaensis	1	?	?	0	?	1	1	0	0	0	1	?	?	2	?	1	0	0	?	?	?	?	?	?	?	?	1	0	0	?	0	-	0	1	0	?	?	?	1	0	?	0	?	0	1	?	0	0	0
Atlantosuchus_coupatezi	1	?	?	0	?	1	1	0	0	0	1	?	?	0	?	1	1	?	?	?	?	?	?	?	?	?	1	?	?	0	0	-	0	1	?	?	?	?	1	?	?	?	?	?	1	?	?	?	0
Cerrejonisuchus_improcerus	1	?	1	0	?	0	1	0	0	0	1	?	?	0	?	0	2	0	?	?	?	?	?	?	?	?	1	0	0	0	0	0	0	1	0	?	2	1	1	0	0	0	?	1	0	1	1	0	1
Chenanisuchus_lateroculi	1	?	1	0	?	0	1	0	0	0	1	?	?	0	?	0	2	?	?	?	?	?	?	?	?	?	1	?	?	0	0	?	0	1	0	?	?	1	1	0	0	0	?	1	0	?	?	?	1
Congosaurus_bequaerti	1	?	?	?	?	1	1	0	0	0	2	?	?	2	?	?	?	0	?	?	?	?	?	?	?	?	1	0	0	0	0	-	0	1	0	?	1	0	1	0	0	0	?	0	1	1	1	0	1
Dyrosaurus_maghribensis	1	5	1	0	?	1	1	0	0	0	1	?	?	0	?	0	1	0	0	?	?	?	?	?	?	2	1	0	0	0	0	-	0	1	0	?	?	?	1	0	0	0	?	0	1	?	0	0	0
Dyrosaurus_phosphaticus	1	?	?	0	?	1	1	0	0	0	1	?	?	0	?	0	2	0	?	?	?	?	?	?	?	?	1	0	0	0	0	-	0	1	0	0	1	0	1	0	0	0	?	0	1	?	0	0	1
Guarinisuchus_munizi	1	5	1	0	?	1	1	0	0	0	0	?	?	0	?	1	1	0	0	?	?	?	?	?	?	2	1	0	0	0	0	-	0	1	0	0	1	0	1	0	0	0	?	0	1	?	0	0	?
Hyposaurus_rogersii	1	5	1	0	1	1	1	0	0	0	1	?	?	0	?	1	2	?	?	?	?	?	?	?	?	?	1	?	?	0	0	?	0	1	0	?	?	0	1	0	?	0	?	0	1	?	1	0	0
Phosphatosaurus_gavialoides	?	?	?	?	1	1	0	0	0	0	?	?	?	?	?	1	2	?	?	?	?	?	?	?	?	?	?	?	?	?	?	?	0	1	0	?	1	1	1	0	?	0	?	1	0	1	1	0	1
Rhabdognathus_keiniensis	1	?	?	0	2	1	1	0	0	0	0	?	?	0	?	1	1	?	?	?	?	?	?	?	?	2	?	?	?	0	?	?	?	?	?	?	?	?	?	?	?	?	?	?	?	?	?	?	?
Rhabdognathus_aslerensis	1	5	1	0	?	?	1	0	0	0	0	?	?	0	?	1	1	0	0	?	?	?	1	?	?	2	?	?	?	0	0	?	?	?	?	?	?	?	?	?	?	?	?	?	?	?	?	?	?
Sabinosuchus_coahuilensis	?	?	?	?	0	1	?	0	0	0	0	?	?	2	?	?	?	?	?	?	?	?	?	?	?	?	?	?	?	?	?	?	?	?	?	?	?	?	?	?	?	?	?	?	?	?	?	?	?
Sokotosuchus_ianwilsoni	?	?	?	?	2	1	0	0	0	0	1	?	?	1	?	1	2	0	?	?	?	?	?	?	?	?	?	?	?	?	?	?	0	1	0	?	1	1	1	?	?	0	?	1	0	1	1	0	1
Bernissartia_fagesii	1	1	0	1	?	0	0	0	0	0	1	?	?	?	?	0	2	0	0	?	?	?	?	?	1	2	1	?	?	0	0	?	0	0	0	?	?	0	1	0	0	0	?	?	0	?	0	0	?
Koumpiodontosuchus_aprosdokiti	1	1	0	?	?	0	0	0	0	0	1	?	?	1	?	0	2	0	0	?	?	?	?	?	?	2	1	1	1	0	0	?	0	0	0	0	?	?	1	0	?	?	?	?	?	?	0	0	0
Susisuchus_anatoceps	1	1	0	1	?	0	0	0	0	0	1	?	?	0	?	0	2	?	?	?	?	?	?	?	?	?	1	?	1	0	0	-	0	1	4	0	?	?	1	0	0	?	?	?	?	?	?	?	1
Isisfordia_duncani	1	1	0	1	?	0	0	0	0	0	1	?	?	0	?	0	2	0	0	?	?	?	?	?	?	2	?	?	?	0	?	-	0	1	4	0	0	?	1	0	0	0	?	?	?	0	0	0	1
Pietraroiasuchus_ormezzanoi	1	?	?	1	?	0	0	0	0	0	?	?	?	0	?	0	2	0	0	?	?	?	?	?	?	?	1	?	?	0	?	?	0	1	?	0	0	0	1	0	0	1	?	0	0	?	0	0	2
Pachycheilosuchus_trinquei	?	?	?	?	?	?	?	?	?	?	?	?	?	?	?	?	?	0	?	?	?	?	?	?	?	?	?	?	?	?	?	?	?	?	?	?	?	?	?	?	?	?	?	?	?	?	?	?	?
Iharkutosuchus_makadii	1	?	?	1	2	0	0	0	0	0	1	?	?	0	?	0	2	0	0	?	?	?	?	?	1	2	?	?	?	?	0	?	0	0	0	?	0	0	1	0	0	1	?	0	0	0	0	0	2
Gavialis_gangeticus	1	1	0	1	?	1	1	0	0	1	1	?	?	0	?	0	2	0	0	0	0	0	1	1	1	2	1	0	0	0	0	-	0	1	0	0	0	0	1	0	0	1	?	0	0	?	0	0	0
Crocodylus_porosus	1	1	0	1	2	0	0	0	0	0	1	?	?	0	?	0	2	0	0	0	0	0	1	1	1	2	1	0	0	0	0	1	0	1	0	0	0	0	1	0	0	1	?	0	0	?	0	0	2
Crocodylus_niloticus	1	1	0	1	2	0	0	0	0	0	1	?	?	0	?	0	2	0	0	0	0	0	1	1	1	2	1	0	0	0	0	1	0	1	0	0	0	0	1	0	0	1	?	0	0	?	0	0	2
Alligator_mississippiensis	1	1	0	1	2	0	0	0	0	0	1	?	?	0	?	0	2	0	0	0	0	0	1	1	1	2	1	0	0	0	0	1	0	1	0	0	0	0	1	0	0	1	?	0	0	0	0	0	2
Plagiophthalmosuchus_gracilirostris	1	0	0	0	0	2	1	0	0	0	3	1	1	0	0	0	2	?	?	?	?	?	0	?	0	?	0	1	1	0	0	-	0	1	1	?	0	0	1	0	1	0	1	0	0	?	-	0	0
Mystriosaurus_laurillardi	1	?	?	?	1	0	1	0	0	0	3	0	0	0	0	?	?	?	?	?	?	?	?	?	?	?	1	1	1	0	0	-	0	0	1	1	0	0	1	0	1	0	0	0	0	?	-	1	1
Chinese_teleosauroid	1	3	1	0	1	0	1	0	0	0	0	0	0	0	0	0	2	0	0	1	1	?	?	2	?	2	0	1	1	0	0	-	0	0	1	1	0	0	1	0	1	0	0	0	0	0	-	1	0
Indosinosuchus_potamosiamensis	1	4	0	0	1	2	1	0	0	1	0	1	1	0	0	0	2	0	0	?	?	?	?	2	0	2	0	1	1	0	0	-	0	0	1	1	0	0	1	0	1	0	1	0	0	0	-	1	0
Indosinosuchus_kalasinensis	1	4	0	0	?	2	1	0	0	0	0	?	?	0	0	0	2	?	?	?	?	?	?	?	?	?	0	1	1	0	0	-	0	0	1	0	0	0	1	0	1	0	1	0	0	?	-	1	1
Platysuchus_multiscrobiculatus	1	5	0	0	1	2	1	0	0	0	3	0	0	0	0	0	2	0	0	?	?	?	?	2	?	?	0	1	1	0	0	-	0	0	1	?	0	0	1	0	1	0	1	0	0	?	-	1	1
Teleosaurus_cadomensis	1	5	0	0	?	2	1	0	0	1	3	0	0	0	0	0	2	0	0	?	?	?	0	2	0	?	?	?	?	0	0	-	?	0	1	?	0	0	1	?	?	?	?	0	?	?	?	?	?
Mycterosuchus_nasutus	1	4	0	0	0	2	1	0	0	1	3	0	0	0	0	0	2	0	0	?	?	?	?	2	?	?	0	1	1	0	0	-	?	0	1	?	0	0	1	0	1	0	1	0	0	0	-	1	0
Bathysuchus_megarhinus	1	?	?	0	0	2	1	0	0	1	0	1	?	3	?	0	1	0	?	?	?	?	?	?	?	?	0	1	1	0	0	-	0	0	1	1	0	0	1	0	1	0	1	0	0	0	-	1	0
Sericodon_jugleri	?	?	?	?	?	2	?	0	0	1	0	1	1	{13}	1	1	{01}	0	?	?	?	?	?	2	?	?	0	1	1	0	?	-	0	0	{01}	?	0	?	1	0	?	0	?	0	0	0	-	1	0
Aeolodon_priscus	?	?	?	?	0	2	1	0	0	1	0	1	1	1	1	?	?	?	?	?	?	?	?	?	?	?	0	1	1	0	0	-	0	0	1	1	0	0	?	0	?	0	1	0	0	?	-	1	0
Macrospondylus_bollensis	1	0	0	0	{01}	2	1	0	0	0	3	0	1	0	0	0	2	0	0	1	1	?	0	2	?	2	0	1	1	0	0	-	0	1	1	0	0	0	1	0	1	0	1	0	0	0	-	0	1
Clovesuurdameredeor_stephani	1	?	?	?	?	?	?	?	0	0	?	0	0	0	0	0	2	0	?	?	?	?	?	?	?	?	?	?	?	?	0	?	?	?	?	?	?	?	?	?	?	?	?	?	?	?	?	?	?
Andrianavoay_baroni	?	?	?	?	?	?	1	0	0	?	3	?	?	?	?	?	?	0	?	?	?	?	?	?	?	?	0	1	1	0	?	-	?	?	1	?	0	?	1	?	?	?	?	0	?	0	?	0	?
Charitomenosuchus_leedsi	1	3	1	0	0	2	1	0	0	0	3	0	{01}	0	1	0	2	0	0	?	?	?	?	2	?	?	0	1	1	0	0	-	0	1	1	0	0	0	1	0	1	0	1	0	0	0	-	0	1
Seldsienean_megistorhynchus	?	?	?	?	?	2	?	0	0	1	3	0	0	0	1	0	?	0	?	?	?	?	?	?	?	?	0	1	1	0	0	-	0	{01}	1	?	0	0	1	0	?	0	1	0	0	0	-	0	0
Deslongchampsina_larteti	1	?	?	?	1	2	1	0	0	0	3	0	0	0	1	0	2	0	0	?	?	?	?	2	?	?	0	1	1	0	0	-	0	1	1	0	0	0	1	0	1	0	?	0	0	0	-	0	?
Proexochokefalos_heberti	1	3	1	0	1	2	1	0	0	0	3	0	0	0	1	0	2	0	0	?	?	?	?	2	?	2	0	1	1	0	0	-	0	1	1	0	0	0	1	0	1	0	1	0	0	0	-	0	?
Proexochokefalos_cf_bouchardi	?	3	1	0	?	2	?	0	0	0	3	?	?	?	?	?	2	0	0	?	?	?	?	?	?	?	?	?	?	?	?	-	?	?	?	?	?	?	?	?	?	?	?	?	?	?	-	?	?
Steneosaurus_rostromajor	?	?	?	?	?	?	1	?	?	?	3	?	?	?	?	?	?	0	?	?	?	?	?	?	?	?	?	?	1	0	?	-	?	?	?	?	?	?	?	?	?	?	?	?	?	?	-	?	?
Neosteneosaurus_edwardsi	1	3	1	0	1	0	1	0	0	0	3	0	?	0	1	0	2	0	0	?	?	?	?	2	?	?	0	1	1	0	0	-	0	1	1	0	0	0	1	0	1	0	1	0	0	0	-	0	1
Yvridiosuchus_boutilieri	1	3	1	0	1	0	1	0	0	0	3	0	?	0	1	0	2	0	0	?	?	?	?	2	?	?	1	1	1	0	0	-	0	1	1	0	0	0	1	0	1	0	1	0	0	?	-	0	1
Lemmysuchus_obtusidens	1	3	1	0	1	0	1	0	0	0	3	0	0	0	1	0	2	0	0	?	?	?	?	2	?	?	1	1	1	0	0	-	0	1	1	0	0	0	1	0	1	0	1	0	0	0	-	0	1
Machimosaurus_buffetauti	1	3	1	0	1	0	0	0	0	0	3	0	0	0	1	0	2	0	0	?	?	?	?	2	?	?	1	1	1	0	0	0	0	1	1	0	0	0	1	0	1	0	0	0	0	0	-	0	1
Machimosaurus_mosae	1	?	?	0	2	0	0	0	0	0	2	?	?	0	?	0	2	0	0	?	?	?	?	?	?	?	1	1	1	?	0	0	0	1	1	?	0	0	1	0	1	0	0	0	0	0	-	0	?
Machimosaurus_hugii	?	?	?	?	?	0	0	0	0	0	2	?	?	?	?	?	?	0	?	?	?	?	?	?	?	?	?	?	?	0	0	?	?	?	?	?	?	?	?	?	?	?	?	?	?	?	?	?	?
Machimosaurus_rex	?	?	?	?	?	0	0	0	0	0	2	?	?	?	?	?	?	?	0	?	?	?	?	?	?	?	?	?	?	?	0	?	?	?	?	?	?	?	?	?	?	?	?	?	?	?	?	?	?
Pelagosaurus_typus	1	2	1	0	0	2	1	0	0	0	3	?	?	0	?	0	2	0	0	1	1	0	0	2	0	2	0	1	1	0	0	-	0	1	0	0	0	0	1	0	1	?	?	0	0	?	0	0	0
Peipehsuchus_teleorhinus	?	?	?	?	?	?	1	0	0	?	3	?	?	?	?	?	?	?	?	?	?	?	?	?	?	?	?	1	1	?	?	?	0	1	2	?	0	0	1	0	1	0	?	0	0	?	0	0	1
Teleidosaurus_calvadosii	1	3	1	0	?	0	1	0	0	0	3	?	?	0	?	0	2	?	?	?	?	?	?	2	?	?	?	1	1	0	0	-	0	1	2	0	0	0	1	0	1	0	?	0	0	?	0	0	1
Metriorhynchoid_indet_T	1	3	1	0	0	2	1	0	0	0	3	?	?	0	?	0	2	0	0	?	?	?	0	2	0	2	0	1	1	0	0	-	?	?	?	?	?	?	?	?	?	?	?	?	?	?	?	?	?
Magyarosuchus_fitosi	?	?	?	?	?	?	?	?	?	?	?	?	?	?	?	?	?	?	?	?	?	?	?	?	?	?	?	?	?	?	?	?	?	?	?	?	?	?	?	?	?	?	?	?	?	?	?	?	?
Eoneustes_gaudryi	?	?	?	?	?	?	1	0	0	0	3	?	?	0	?	?	?	0	?	?	?	?	?	?	?	?	?	?	?	0	0	?	?	?	?	?	?	?	?	?	?	?	?	?	?	?	?	?	?
Chile_metriorhynchoid	?	?	?	?	?	?	?	?	?	?	?	?	?	0	?	?	?	?	?	?	?	?	?	?	?	?	?	?	?	?	?	?	?	?	?	?	?	?	?	?	?	?	?	?	?	?	?	?	?
Zoneait_nargorum	?	?	?	?	?	?	1	0	?	?	?	?	?	0	?	0	?	?	?	?	?	?	0	?	?	?	?	?	?	?	0	?	?	?	?	?	?	?	?	?	?	?	?	?	?	?	?	?	?
Solnhofen_Cricosaurus	?	?	?	?	?	?	?	0	0	?	2	?	?	?	?	?	?	?	?	?	?	?	?	?	?	?	1	1	1	0	0	-	0	1	3	?	0	-	3	0	1	?	?	0	-	?	0	0	3
Cricosaurus_bambergensis	?	?	?	?	?	?	?	0	?	?	?	?	?	?	?	?	?	?	?	?	?	?	?	?	?	?	?	?	?	?	?	-	?	?	?	?	?	?	?	?	?	?	?	?	?	0	0	0	?
Cricosaurus_elegans	?	?	?	?	?	2	?	0	0	0	2	?	?	0	?	?	?	?	?	?	?	?	?	?	?	?	1	1	1	0	0	-	0	1	3	?	0	-	3	0	?	?	?	0	-	?	0	0	3
Cricosaurus_suevicus	0	3	1	?	?	2	1	0	0	0	2	?	?	0	?	1	0	?	?	?	?	?	?	?	?	?	1	1	1	0	0	-	0	1	3	?	0	-	3	0	1	?	?	0	-	?	0	0	3
Cricosaurus_schroederi	0	3	1	0	?	?	1	0	0	0	0	?	?	3	?	1	0	0	?	?	?	?	?	2	?	?	1	1	1	0	0	-	0	1	?	?	?	?	?	?	?	?	?	?	?	?	?	?	?
Cricosaurus_araucanensis	0	3	1	0	0	2	1	0	0	0	0	?	?	3	?	1	0	0	0	?	1	1	0	2	0	2	1	1	1	0	0	-	0	1	3	0	0	-	3	0	1	?	?	0	-	0	0	0	3
Cricosaurus_vignaudi	?	?	?	?	?	2	1	0	0	0	0	?	?	3	?	1	0	?	?	?	?	?	?	?	?	?	?	?	?	?	?	-	?	?	?	?	?	-	3	0	?	?	?	0	-	?	?	?	3
Cricosaurus_lithographicus	?	?	?	?	?	2	1	0	0	0	0	?	?	3	?	1	0	0	?	?	?	?	?	?	?	2	?	1	1	?	?	-	0	1	3	?	0	-	3	0	1	?	?	0	-	?	0	0	3
Dakosaurus_lissocephalus	?	?	?	0	?	?	?	?	?	?	?	?	?	1	?	1	0	?	?	?	?	?	?	2	?	?	?	?	?	?	?	?	?	?	?	?	?	?	?	?	?	?	?	?	?	?	?	?	?
Cricosaurus_sp_Cuba	1	?	?	0	?	?	?	?	?	?	?	?	?	1	?	?	?	?	?	?	?	?	?	?	?	?	?	?	?	?	?	?	?	?	?	?	?	?	?	?	?	?	?	?	?	?	?	?	?
Rhacheosaurus_gracilis	1	3	1	0	?	2	1	0	0	0	2	?	?	?	?	?	?	?	?	?	?	?	?	2	?	?	1	?	1	0	0	-	0	1	3	?	0	-	3	0	?	?	?	0	-	?	?	0	3
Metriorhynchidae_indet_Cuba	1	?	?	?	?	?	1	0	?	?	?	?	?	?	?	?	?	?	?	?	?	?	?	?	?	?	?	?	?	?	?	?	?	?	?	?	?	?	?	?	?	?	?	?	?	?	?	?	?
Cricosaurus_macrospondylus	?	?	?	?	?	?	1	0	0	?	2	?	?	3	?	1	?	?	?	?	?	?	?	?	?	?	?	1	1	0	0	-	0	1	3	?	0	-	3	0	?	?	?	0	-	?	0	0	3
Cricosaurus_saltillensis	?	?	?	?	?	0	?	0	0	0	2	?	?	3	?	1	?	?	?	?	?	?	?	?	?	?	?	?	?	0	?	-	0	1	3	?	0	-	3	0	?	?	?	0	-	?	0	0	?
Metriorhynchus_palpebrosus	1	3	1	0	?	2	1	0	0	0	2	?	?	?	?	?	1	0	?	?	?	?	?	2	?	?	?	?	?	0	0	-	0	1	3	?	0	-	3	0	?	?	?	0	-	0	0	0	?
Maledictosuchus_nuyivijanan	?	?	?	?	?	?	?	0	0	?	2	?	?	?	?	?	?	0	?	?	?	1	?	?	?	?	?	?	1	0	0	-	?	?	?	?	?	?	?	?	?	?	?	?	?	?	?	?	?
Maledictosuchus_riclaensis	1	3	1	?	?	2	1	0	0	0	2	?	?	2	?	?	1	0	?	?	?	?	?	?	?	?	1	1	1	0	0	-	0	1	3	?	0	-	2	0	?	?	?	0	-	0	0	0	1
Gracilineustes_acutus	?	?	?	?	?	2	1	0	0	0	?	?	?	3	?	?	?	?	?	?	?	?	?	?	?	?	?	?	?	?	?	-	?	1	3	?	?	0	2	?	?	?	?	0	0	?	0	?	0
Gracilineustes_leedsi	1	3	1	0	0	2	1	0	0	0	0	?	?	3	?	1	0	0	?	?	?	?	?	2	0	2	1	1	1	0	0	-	0	1	3	?	0	0	2	0	1	0	?	0	0	0	0	0	1
Metriorhynchus_geoffroyii	?	?	?	?	?	?	1	0	0	?	?	?	?	?	?	?	?	?	?	?	?	?	?	?	?	?	1	1	1	?	0	?	0	1	3	?	0	0	2	0	1	0	?	0	0	0	0	0	1
Metriorhynchus_superciliosus	1	3	1	0	1	2	1	0	0	0	3	?	?	0	?	0	1	0	0	?	1	1	?	2	0	2	1	1	1	0	0	-	0	1	3	0	0	0	2	0	1	0	?	0	0	0	0	0	1
Metriorhynchus_casamiquelai	?	?	?	0	1	0	0	0	0	0	0	?	?	3	?	?	0	0	0	?	?	?	?	2	?	2	?	?	?	0	0	0	0	1	3	0	?	0	2	0	1	?	?	0	0	?	0	?	2
Metriorhynchus_westermanni	?	?	?	?	?	?	?	?	0	0	?	?	?	3	?	?	?	?	?	?	?	?	0	?	?	2	?	?	?	?	?	?	?	?	?	?	?	?	?	?	?	?	?	?	?	?	?	?	?
Neptunidraco_ammoniticus	?	?	?	?	?	?	0	?	?	?	?	?	?	?	?	?	?	?	?	?	?	?	?	?	?	?	?	?	?	?	?	?	?	?	?	?	?	?	?	?	?	?	?	?	?	?	?	?	?
Metriorhynchus_brachyrhynchus	1	3	1	0	{12}	0	0	0	0	0	3	?	?	0	?	0	1	0	0	?	?	?	?	2	0	2	1	1	1	0	0	0	0	1	3	0	0	0	2	0	1	0	?	0	0	0	0	0	1
Tyrannoneustes_lythrodectikos	1	3	1	0	?	0	0	0	0	0	3	?	?	0	?	0	1	0	?	?	?	?	?	?	0	?	1	1	1	0	0	-	0	1	3	0	0	0	2	0	1	?	?	0	0	0	?	0	?
Swiss_hastifer	?	?	?	?	?	?	?	?	?	?	2	?	?	?	?	?	?	?	?	?	?	?	?	?	?	?	1	?	1	?	?	?	0	1	3	?	0	0	2	0	1	0	?	0	0	0	0	0	1
Chouquet_hastifer	?	?	?	?	?	0	0	0	0	0	2	?	?	2	?	?	?	0	?	?	?	?	?	?	?	?	?	?	?	?	?	?	0	1	3	?	0	0	2	0	1	?	?	0	0	?	0	0	2
Mr_Passmores_specimen	?	?	?	0	?	0	0	0	0	0	3	?	?	2	?	?	?	?	?	?	?	?	?	?	?	?	1	?	1	?	0	?	0	1	3	?	0	0	2	0	?	0	?	0	0	?	0	?	?
cf_Torvoneustes_MANCH_J6459	?	?	?	?	?	?	0	0	0	?	2	?	?	2	?	?	?	?	?	?	?	?	?	?	?	?	?	?	?	?	?	?	?	?	?	?	?	?	?	?	?	?	?	?	?	?	?	?	?
Torvoneustes_coryphaeus	1	3	1	0	?	?	?	?	?	0	2	?	?	2	?	1	0	0	?	?	?	?	?	2	?	?	?	?	?	0	0	?	?	?	?	?	?	?	?	?	?	?	?	?	?	?	?	?	?
Torvoneustes_carpenteri	?	?	?	?	?	0	0	0	0	0	2	?	?	3	?	1	0	0	?	?	?	?	?	?	?	?	?	?	?	0	0	?	0	?	3	?	0	0	2	?	1	0	?	0	0	?	0	?	1
Torvoneustes_mexicanus	?	?	?	?	?	?	?	?	?	?	?	?	?	?	?	?	?	?	?	?	?	?	?	?	?	?	?	?	?	?	?	?	?	?	?	?	?	?	?	?	?	?	?	?	?	?	?	?	?
Torvoneustes_sp_SEC_K1707	?	?	?	?	?	?	?	?	?	?	?	?	?	?	?	?	?	?	?	?	?	?	?	?	?	?	?	?	?	?	?	?	?	?	?	?	?	?	?	?	?	?	?	?	?	?	?	?	?
Purranisaurus_potens	1	3	1	0	?	?	?	0	0	0	?	?	?	?	?	?	?	0	0	?	?	?	?	2	0	2	?	?	?	0	0	?	?	?	?	?	?	?	?	?	?	?	?	?	?	?	?	?	?
Ieldraan_melkshamensis	?	?	?	?	?	?	?	?	0	?	1	?	?	0	?	?	?	?	?	?	?	?	?	?	?	?	?	?	?	?	0	0	?	?	?	?	?	?	?	?	?	?	?	?	?	?	?	?	?
Geosaurus_giganteus	?	?	?	?	?	0	?	?	0	?	1	?	?	3	?	?	?	?	0	?	?	?	?	?	?	?	1	1	1	0	0	0	0	?	3	?	0	0	2	?	?	?	?	?	0	?	?	?	2
Geosaurus_grandis	?	3	1	0	?	0	0	0	0	0	1	?	?	3	?	?	1	?	?	?	?	?	?	?	?	?	1	1	1	0	0	0	0	1	3	?	0	0	2	0	?	0	?	?	0	?	0	0	2
Geosaurus_lapparenti	?	?	?	?	?	?	?	?	?	?	?	?	?	3	?	?	?	?	?	?	?	?	?	?	?	?	?	?	?	?	?	?	?	?	?	?	?	?	?	?	?	?	?	?	?	?	?	?	?
Suchodus_durobrivensis	1	3	1	0	?	0	0	0	0	0	2	?	?	0	?	0	1	0	?	?	?	?	?	2	?	?	1	?	?	?	0	0	0	?	3	?	0	?	2	?	?	?	?	?	?	?	?	?	?
Plesiosuchus_manselii	1	3	1	0	?	0	0	0	0	0	2	?	?	1	?	?	?	0	?	?	?	?	?	2	?	2	1	?	?	0	0	0	0	1	3	0	0	0	2	0	1	0	?	0	0	0	0	0	2
Dakosaurus_andiniensis	0	3	1	0	?	0	2	1	0	0	0	?	?	3	?	1	?	0	0	?	1	?	?	?	?	?	1	1	1	0	0	0	0	1	3	0	0	0	3	0	?	?	?	?	?	?	0	0	2
Dakosaurus_maximus	?	3	1	?	?	0	0	1	0	0	3	?	?	1	?	1	?	0	?	?	?	?	?	?	?	?	1	1	1	0	0	0	0	1	3	?	0	0	3	0	1	0	?	?	?	?	0	0	2
Mr_Leeds_dakosaur	1	3	1	0	?	0	0	1	0	0	3	?	?	0	?	0	1	0	?	?	?	?	?	2	0	?	1	1	1	0	0	0	0	1	3	?	0	0	?	?	?	0	?	0	0	?	0	0	2
Vaches_Noire_dakosaur	?	?	?	?	?	?	?	1	0	0	3	?	?	0	?	?	?	?	?	?	?	?	?	?	?	?	?	?	?	0	0	?	?	?	?	?	?	?	?	?	?	?	?	?	?	?	?	?	?
EXTRA
Cassissuchus_sanziuami	0	?	?	?	?	0	2	0	0	?	0	?	?	0	?	0	2	?	?	?	?	?	?	?	?	2	0	?	?	?	?	?	0	0	0	?	0	0	1	0	?	0	1	0	0	0	0	0	1
Mysteriosaurus_laurillardi_HLMD	?	?	?	?	?	0	1	0	0	?	3	?	?	?	?	?	?	?	?	?	?	?	?	?	?	?	1	1	1	0	?	-	0	0	1	1	0	0	1	0	1	0	0	0	0	?	-	1	1
EXCLUDED
Geosaurine_indet_Argentina	?	?	?	?	?	?	?	?	?	?	?	?	?	0	?	?	?	?	?	?	?	?	?	?	?	?	?	?	?	?	?	?	?	?	?	?	?	?	?	?	?	?	?	?	?	?	?	?	?
Metriorhynchus_hastifer	?	?	?	?	?	0	0	0	0	0	2	0	1	2	0	?	?	0	?	?	?	?	?	?	?	?	?	?	?	?	?	?	?	?	?	?	?	?	2	?	?	?	?	0	?	?	?	?	?
Pelagosaurus_tomarensis	1	3	1	0	0	2	1	0	0	0	2	?	?	1	?	0	1	0	?	?	?	?	?	2	0	2	?	1	1	0	0	-	?	?	?	?	?	?	?	?	?	?	?	?	?	?	?	?	?
Sinemurian_taxon	?	?	?	?	?	?	?	0	0	?	3	?	?	?	?	?	?	0	?	?	?	?	?	?	?	?	?	?	?	?	?	?	?	?	?	?	?	?	?	?	?	?	?	?	?	?	?	?	?
Dorchester_hastifer	1	?	?	?	?	0	?	0	0	0	2	0	1	2	0	0	?	0	?	?	?	?	?	?	?	?	1	1	1	0	?	?	0	1	3	?	0	0	2	0	1	0	1	0	0	0	0	0	1
Undescribed_sphenosuchian	0	?	0	0	?	?	2	?	?	?	?	?	?	2	?	1	?	?	?	0	0	?	0	?	?	1	?	?	?	?	?	?	?	?	?	?	?	?	?	?	?	?	?	?	?	?	?	?	?
PREVIOUS TELEOSAUROID DATA
Steneosaurus_gracilirostris	1	0	0	0	0	2	1	0	0	0	3	?	?	0	?	0	2	?	?	1	1	?	0	?	0	?	0	1	1	0	0	-	0	1	1	?	0	0	1	0	1	0	?	0	0	?	0	0	{01}
Mystriosaurus_laurillardi	1	?	?	?	1	0	1	0	0	0	3	?	?	0	?	?	?	?	?	?	?	?	?	?	?	?	1	1	1	0	0	-	0	0	1	1	0	0	1	0	1	0	?	0	0	?	0	1	1
Chinese_teleosauroid	1	3	1	0	1	0	1	0	0	0	0	?	?	0	?	0	2	0	0	1	1	?	?	2	?	2	?	1	1	0	0	-	0	0	1	1	0	0	1	0	1	0	?	0	0	0	0	1	0
Platysuchus_multiscrobiculatus	1	5	0	0	1	2	1	0	0	0	3	?	?	0	?	0	2	?	0	?	?	?	?	2	?	?	0	1	1	0	0	-	0	0	1	?	0	0	1	0	1	0	?	0	0	?	?	1	1
Teleosaurus_cadomensis	1	5	0	0	?	2	1	0	0	1	3	?	?	0	?	0	2	0	0	?	?	?	0	2	0	?	?	?	?	0	0	-	?	0	1	?	0	0	1	0	?	?	?	0	?	?	?	?	1
Mycterosuchus_nasutus	1	3	1	0	0	2	1	0	0	1	3	?	?	0	?	0	2	0	0	?	?	?	?	2	?	?	1	1	1	0	0	-	0	0	1	?	0	0	1	0	1	0	?	0	0	0	0	1	?
Teleosaurus_megarhinus	?	?	?	?	0	2	1	0	0	1	0	?	?	3	?	0	1	0	?	?	?	?	?	?	?	?	1	1	1	0	0	-	0	0	1	1	0	0	1	0	1	0	?	0	0	0	0	1	0
Steneosaurus_bollensis	1	0	0	0	{01}	2	1	0	0	0	3	?	?	0	?	0	2	0	0	1	1	?	0	2	?	2	0	1	1	0	0	-	0	1	1	0	0	0	1	0	1	0	?	0	0	0	0	0	1
Steneosaurus_leedsi	1	3	1	0	0	2	1	0	0	0	3	?	?	0	?	0	2	0	0	?	?	?	?	2	?	?	0	1	1	0	0	-	0	1	1	0	0	0	1	0	1	0	?	0	0	0	0	0	1
Aeolodon_priscus	?	?	?	?	0	2	1	0	0	1	0	?	?	0	?	1	?	?	?	?	?	?	?	?	?	?	?	?	?	?	0	-	0	?	1	1	0	0	?	0	?	?	?	0	0	?	?	?	1
Steneosaurus_larteti	1	?	?	?	1	2	1	0	0	0	3	?	?	0	?	0	2	0	0	?	?	?	?	2	?	?	0	1	1	0	0	-	0	1	1	0	0	0	1	0	1	0	?	0	0	0	0	0	?
Steneosaurus_heberti	1	3	1	0	1	2	1	0	0	0	3	?	?	0	?	0	2	0	0	?	?	?	?	2	?	2	0	1	1	0	0	-	0	1	1	0	0	0	1	0	1	0	?	0	0	0	0	0	?
Steneosaurus_edwardsi	1	3	1	0	1	0	1	0	0	0	3	?	?	0	?	0	2	0	0	?	?	?	?	2	?	?	0	1	1	0	0	-	0	1	1	0	0	0	1	0	1	0	?	0	0	0	0	0	1
Lemmysuchus_obtusidens	1	3	1	0	1	0	1	0	0	0	3	?	?	0	?	0	2	0	0	?	?	?	?	2	?	?	1	1	1	0	0	-	0	1	1	0	0	0	1	0	1	0	?	0	0	0	0	0	1
Machimosaurus_buffetauti	1	3	1	0	1	0	0	0	0	0	3	?	?	0	?	0	2	0	0	?	?	?	?	2	?	?	1	1	1	0	0	0	0	1	1	0	0	0	1	0	1	0	?	0	0	0	0	0	1
Machimosaurus_mosae	1	?	?	0	2	0	0	0	0	0	2	?	?	0	?	0	2	0	0	?	?	?	?	?	?	?	1	1	1	?	0	0	0	1	1	?	0	0	1	0	1	0	?	0	0	0	0	0	?
Machimosaurus_hugii	?	?	?	?	?	0	0	0	0	0	2	?	?	?	?	?	?	?	?	?	?	?	?	?	?	?	1	?	?	?	0	?	?	?	?	?	?	?	?	0	?	?	?	?	?	?	?	?	?
[truncated: 453 more columns]

## Sheet: Conversion sheet
Taxa	1	2	3	4	5	6	7	8	9	10	11	12	13	14	15	16	17	18	19	20	21	22	23	24	25	26	27	28	29	30	31	32	33	34	35	36	37	38	39	40	41	42	43	44	45	46	47	48	49
Postosuchus_kirkpatricki	0	?	?	0	?	0	2	?	0	0	?			2		?	?	?	0	?	?	?	?	0	0	1	0	1	1	0	0	0	0	0	0	?	0	?	1	0	0	0		0	0	?	0	0	3
Carnufex_carolinensis	0	?	?	?	?	0	2	0	0	?	1			?		?	?	?	?	?	?	?	?	?	?	?	0	?	1	0	0	0	0	0	0	?	0	0	1	0	?	?		0	0	?	0	0	1
Undescribed_sphenosuchian	0	?	0	0	?	?	2	?	?	?	?			2		1	?	?	?	0	0	?	0	?	?	1	?	?	?	?	?	?	?	?	?	?	?	?	?	?	?	?		?	?	?	?	?	?
Dromicosuchus_grallator	?	?	?	0	?	0	2	0	0	0	0			2		1	?	?	?	?	?	?	?	0	?	?	0	?	0	0	?	?	0	0	?	?	0	0	1	0	0	0		0	0	?	0	0	0
Hesperosuchus_cf_agilis	?	?	?	0	?	0	2	0	0	0	0			2		1	?	?	?	?	?	?	?	0	?	1	0	?	0	0	?	?	0	0	0	?	0	0	1	0	0	0		0	0	?	0	0	0
Dibothrosuchus_elaphros	0	0	0	0	?	0	2	0	0	0	0			?		?	?	0	0	?	?	?	?	0	?	1	0	?	1	?	?	?	?	0	0	?	0	?	?	?	?	0		0	0	0	0	0	3
Terrestrisuchus_gracilis	0	0	0	0	?	0	2	?	0	0	0			2		?	?	0	?	?	?	?	?	0	?	?	0	?	?	?	?	?	?	0	0	?	0	?	?	?	?	?		0	0	?	?	?	?
Junggarsuchus_sloani	0	0	0	0	?	0	2	0	0	0	0			2		1	0	0	0	?	?	?	?	0	?	?	0	1	1	0	0	0	0	0	0	?	0	0	1	0	0	0		0	0	?	0	0	0
Eopneumatosuchus_colberti	1	?	?	?	?	?	?	?	0	0	?			0		0	2	?	?	?	0	?	1	?	?	2	?	?	?	?	?	?	?	?	?	?	?	?	?	?	?	?		?	?	?	?	?	?
Hemiprotosuchus_leali	0	0	0	0	?	0	2	0	0	0	?			?		0	2	?	1	?	?	?	1	0	?	?	0	?	?	0	?	0	0	0	0	?	?	?	1	0	0	0		0	?	?	0	0	?
Protosuchus_richardsoni	0	0	0	0	?	0	2	0	0	1	1			0		0	2	1	1	?	?	0	1	?	?	2	0	1	1	0	0	0	0	0	0	?	0	?	1	0	0	0		0	0	?	0	0	0
Protosuchus_haughtoni	0	0	0	0	?	0	2	0	0	1	1			0		0	2	1	1	?	?	?	?	0	?	2	0	1	1	0	0	0	0	0	0	?	0	?	1	0	0	0		0	0	?	0	0	0
Fruitachampsa_callisoni	1	0	?	?	?	0	0	0	0	0	1			0		0	2	1	?	?	?	?	?	0	?	?	0	?	?	0	?	0	0	0	0	?	?	?	1	0	0	0		?	?	?	?	?	?
Mariliasuchus_amarali	1	4	0	0	?	0	2	?	0	0	2			0		0	?	0	0	?	?	0	?	0	?	2	0	1	1	0	0	0	0	0	5	?	?	?	0	0	0	?		?	?	?	?	?	0
Notosuchus_terrestris	1	4	0	0	?	0	2	?	0	0	2			0		0	2	0	0	?	?	0	1	0	?	2	0	1	1	0	0	0	0	0	5	?	?	0	0	0	0	?		?	?	?	?	?	0
Adamantinasuchus_navae	0	?	?	?	?	0	2	?	0	0	2			0		0	?	?	?	?	?	?	?	0	?	?	0	1	1	0	0	0	0	0	5	?	?	?	1	0	0	?		?	?	?	0	0	0
Sphagesaurus_huenei	0	{04}	0	0	?	0	2	?	0	0	2			0		0	?	0	?	?	?	?	?	?	?	2	0	1	1	0	0	?	0	0	5	?	?	?	1	0	0	?		?	?	?	0	0	0
Caipirasuchus_montealtensis	0	{04}	0	0	?	0	2	?	0	0	2			0		0	?	1	0	?	?	?	?	0	1	2	0	1	1	0	0	0	0	0	5	?	?	?	1	0	0	?		?	?	?	0	0	0
Baurusuchus_pachecoi	0	4	0	0	?	0	2	0	0	0	2			0		0	?	1	0	?	?	?	1	?	?	2	0	1	1	0	0	0	0	0	5	?	0	0	0	0	0	0		0	0	?	0	0	0
Araripesuchus_patagonicus	1	0	0	0	?	0	2	0	0	0	1			0		0	2	0	0	?	?	?	?	1	?	2	0	?	?	?	0	0	?	0	?	?	?	?	?	0	0	?		?	?	?	?	?	?
Montealtosuchus_arrudacamposi	0	0	0	0	?	0	2	0	0	0	1			0		0	2	0	0	?	?	?	?	1	?	2	?	1	0	0	0	0	0	0	5	?	0	0	1	0	0	0		0	0	0	0	0	0
Uberabasuchus_terrificus	0	4	0	0	?	0	2	0	0	0	1			0		0	?	0	0	?	?	?	?	?	?	?	0	1	0	0	0	0	0	0	5	?	0	0	1	0	0	0		0	0	?	0	0	0
cf_Hamadasuchus_rebouli	0	5	0	0	?	0	2	0	0	0	1			0		0	2	0	0	?	0	?	1	1	1	2	0	0	0	0	0	0	0	0	0	?	0	0	1	0	0	0		0	0	0	0	0	0
Sebecus_icaeorhinus	0	5	0	0	?	?	2	0	0	0	1			0		0	?	0	?	?	?	?	1	1	?	2	0	0	0	0	0	0	0	?	0	?	?	?	1	0	?	?		?	?	?	?	?	0
Mahajangasuchus_insignis	1	?	?	0	?	?	0	0	0	0	1			0		0	2	0	0	?	?	?	1	?	1	?	?	?	1	0	0	0	0	?	0	?	?	?	1	?	0	?		?	?	0	?	?	?
Alligatorium_meyeri	?	?	?	?	?	0	0	0	0	0	1			0		0	2	?	?	?	?	?	?	?	?	?	1	1	1	0	0	0	0	1	0	?	0	0	1	0	0	?		0	0	?	0	0	?
Theriosuchus_pusillus	1	{12}	?	1	?	0	0	0	0	0	1			0		0	2	0	0	?	?	?	1	1	1	2	1	?	1	0	0	0	0	1	0	?	0	0	1	0	0	?		0	0	?	0	0	2
Eutretauranosuchus_delfsi	1	1	0	1	?	0	0	0	0	0	1			0		0	2	0	0	?	?	?	?	?	?	2	1	?	1	0	1	0	0	1	0	?	0	?	?	?	0	?		?	?	?	0	0	?
Amphicotylus_stovalli	1	2	1	1	?	0	0	0	0	0	1			0		0	2	0	0	?	?	?	?	?	?	2	1	?	?	0	1	?	1	1	0	?	0	0	1	1	0	?		?	0	1	1	?	?
Goniopholis_baryglphaeus	1	?	?	?	?	0	0	0	0	0	1			0		0	2	0	0	?	?	?	?	?	?	?	1	?	1	0	1	0	1	1	?	?	0	?	1	1	0	?		0	0	?	?	?	0
Goniopholis_kiplingi	1	2	1	1	?	0	0	0	0	0	1			0		0	2	0	?	?	?	0	?	?	1	2	1	1	1	0	1	?	1	1	0	?	0	0	1	1	0	0		?	0	?	1	-	0
Goniopholis_simus	1	2	1	1	?	0	0	0	0	0	1			0		0	2	0	0	?	?	?	?	?	1	2	1	1	1	0	1	0	1	1	0	?	0	?	1	1	0	0		0	0	?	?	-	0
Anteophthalmosuchus_hooleyi	1	2	1	1	?	0	0	0	0	0	1			0		0	2	0	0	?	?	?	?	?	?	2	1	?	1	0	1	0	?	?	?	?	?	?	?	?	?	?		?	?	?	?	?	?
Anteophthalmosuchus_epikrator	1	2	1	1	?	0	0	0	0	0	1			0		0	2	0	?	?	?	?	?	?	1	2	1	1	1	0	1	0	1	1	0	?	0	0	1	?	0	0		0	0	1	1	-	?
Elosuchus_cherifiensis	1	2	1	1	?	1	1	0	0	0	3			0		0	2	0	0	?	?	?	?	?	?	2	1	1	?	0	0	?	0	1	0	?	?	0	?	0	0	0		0	0	2	2	-	?
Elosuchus_broinae	1	2	1	1	?	1	1	0	0	0	3			0		0	2	0	0	?	?	?	?	?	?	2	1	1	?	0	0	?	0	1	0	?	0	0	1	0	0	0		0	0	2	2	-	0
Vectisuchus_leptognathus	1	{12}	?	1	?	0	1	0	0	0	3			0		0	2	?	0	?	?	?	?	?	?	2	1	?	1	0	0	-	0	1	0	?	?	?	1	?	0	?		?	?	?	?	?	?
Pholidosaurus_schaumburgensis	1	0	1	1	?	1	1	0	0	0	1			0		0	2	0	0	?	?	?	1	?	?	2	1	?	?	0	0	-	?	?	?	?	?	?	?	?	?	?		0	?	?	?	?	?
Pholidosaurus_sp_(Charente)	1	2	1	1	2	1	1	0	0	0	3			0		0	2	0	0	?	?	?	?	?	?	2	1	?	?	?	0	-	0	1	0	?	0	0	1	0	0	0		0	0	1	1	-	0
Meridiosaurus_vallisparadisi	?	?	?	?	?	2	1	0	0	?	3			?		?	?	0	?	?	?	?	?	?	?	?	1	1	1	?	?	?	0	1	0	?	0	0	1	0	0	1		0	0	1	1	-	1
Chalawan_thailandicus	1	?	?	?	?	1	0	0	1	0	?			?		0	2	0	?	?	?	?	?	?	?	?	1	?	?	?	?	?	0	1	?	?	?	?	1	?	?	1		0	0	?	2	-	1
Sarcosuchus_hartti	?	?	?	?	?	?	?	?	1	?	?			?		?	?	?	?	?	?	?	?	?	?	?	1	?	?	?	?	0	?	?	?	?	?	?	?	?	?	?		0	?	?	?	?	?
Sarcosuchus_imperator	1	2	1	1	?	1	0	0	1	0	1			0		0	2	0	0	?	?	?	?	?	?	2	1	?	?	0	0	0	0	1	0	?	0	0	1	0	0	1		0	0	1	2	-	1
cf_Terminonaris_robusta	1	?	?	0	?	1	1	0	0	0	1			0		0	2	?	0	?	?	?	?	?	?	?	1	?	1	?	0	-	0	1	0	?	0	0	1	0	?	1		0	1	1	2	-	1
Oceanosuchus_boecensis	1	?	1	?	?	1	1	0	0	?	1			0		0	2	?	?	?	?	?	?	?	?	2	1	?	1	0	0	0	0	1	0	?	0	0	1	0	?	1		0	0	1	2	-	0
Pholidosaurus_purbeckensis	1	1	1	1	?	1	1	0	0	0	3			0		0	1	0	0	?	?	?	?	1	?	2	1	?	?	?	0	-	?	?	?	?	?	?	?	?	?	?		?	?	?	?	?	?
Fortignathus_felixi	?	?	?	?	?	{12}	?	?	0	?	?			?		?	?	?	?	?	?	?	?	?	?	?	1	?	?	?	?	0	?	?	?	?	?	?	?	?	?	?		?	?	?	?	?	?
Acherontisuchus_guajiraensis	?	?	?	?	?	1	1	?	0	?	0			?		?	?	?	?	?	?	?	?	?	?	?	1	?	?	?	?	0	?	?	?	?	?	?	?	?	?	?		?	?	?	?	?	?
Anthracosuchus_balrogus	1	?	?	0	2	0	0	0	0	0	1			0		0	2	0	0	?	?	?	?	?	?	?	1	?	?	0	?	?	0	1	1	?	1	1	1	0	0	0		1	0	1	1	0	2
Arambourgisuchus_khouribgaensis	1	?	?	0	?	1	1	0	0	0	1			2		1	0	0	?	?	?	?	?	?	?	?	1	0	0	?	0	-	0	1	0	?	?	?	1	0	?	0		0	1	?	0	0	0
Atlantosuchus_coupatezi	1	?	?	0	?	1	1	0	0	0	1			0		1	1	?	?	?	?	?	?	?	?	?	1	?	?	0	0	-	0	1	?	?	?	?	1	?	?	?		?	1	?	?	?	0
Cerrejonisuchus_improcerus	1	?	1	0	?	0	1	0	0	0	1			0		0	2	0	?	?	?	?	?	?	?	?	1	0	0	0	0	0	0	1	0	?	2	1	1	0	0	0		1	0	1	1	0	1
Chenanisuchus_lateroculi	1	?	1	0	?	0	1	0	0	0	1			0		0	2	?	?	?	?	?	?	?	?	?	1	?	?	0	0	?	0	1	0	?	?	1	1	0	0	0		1	0	?	?	?	1
Congosaurus_bequaerti	1	?	?	?	?	1	1	0	0	0	2			2		?	?	0	?	?	?	?	?	?	?	?	1	0	0	0	0	-	0	1	0	?	1	0	1	0	0	0		0	1	1	1	0	1
Dyrosaurus_maghribensis	1	5	1	0	?	1	1	0	0	0	1			0		0	1	0	0	?	?	?	?	?	?	2	1	0	0	0	0	-	0	1	0	?	?	?	1	0	0	0		0	1	?	0	0	0
Dyrosaurus_phosphaticus	1	?	?	0	?	1	1	0	0	0	1			0		0	2	0	?	?	?	?	?	?	?	?	1	0	0	0	0	-	0	1	0	?	1	0	1	0	0	0		0	1	?	0	0	1
Guarinisuchus_munizi	1	5	1	0	?	1	1	0	0	0	0			0		1	1	0	0	?	?	?	?	?	?	2	1	0	0	0	0	-	0	1	0	?	1	0	1	0	0	0		0	1	?	0	0	?
Hyposaurus_rogersii	1	5	1	0	1	1	1	0	0	0	1			0		1	2	?	?	?	?	?	?	?	?	?	1	?	?	0	0	?	0	1	0	?	?	0	1	0	?	0		0	1	?	1	0	0
Phosphatosaurus_gavialoides	?	?	?	?	1	1	0	0	0	0	?			?		1	2	?	?	?	?	?	?	?	?	?	?	?	?	?	?	?	0	1	0	?	1	1	1	0	?	0		1	0	1	1	0	1
Rhabdognathus_keiniensis	1	?	?	0	2	1	1	0	0	0	0			0		1	1	?	?	?	?	?	?	?	?	2	?	?	?	0	?	?	?	?	?	?	?	?	?	?	?	?		?	?	?	?	?	?
Rhabdognathus_aslerensis	1	5	1	0	?	?	1	0	0	0	0			0		1	1	0	0	?	?	?	1	?	?	2	?	?	?	0	0	?	?	?	?	?	?	?	?	?	?	?		?	?	?	?	?	?
Sabinosuchus_coahuilensis	?	?	?	?	0	1	?	0	0	0	0			2		?	?	?	?	?	?	?	?	?	?	?	?	?	?	?	?	?	?	?	?	?	?	?	?	?	?	?		?	?	?	?	?	?
Sokotosuchus_ianwilsoni	?	?	?	?	2	1	0	0	0	0	1			1		1	2	0	?	?	?	?	?	?	?	?	?	?	?	?	?	?	0	1	0	?	1	1	1	?	?	0		1	0	1	1	0	1
Bernissartia_fagesii	1	1	0	1	?	0	0	0	0	0	1			?		0	2	0	0	?	?	?	?	?	1	2	1	?	?	0	0	?	0	0	0	?	?	0	1	0	0	0		?	0	?	0	0	?
Koumpiodontosuchus_aprosdokiti	1	1	0	?	?	0	0	0	0	0	1			1		0	2	0	0	?	?	?	?	?	?	2	1	1	1	0	0	?	0	0	0	?	?	?	1	0	?	?		?	?	?	0	0	0
Susisuchus_anatoceps	1	1	0	1	?	0	0	0	0	0	1			0		0	2	?	?	?	?	?	?	?	?	?	1	?	1	0	0	-	0	1	4	?	?	?	1	0	0	?		?	?	?	?	?	1
Isisfordia_duncani	1	1	0	1	?	0	0	0	0	0	1			0		0	2	0	0	?	?	?	?	?	?	2	?	?	?	0	?	-	0	1	4	?	0	?	1	0	0	0		?	?	0	0	0	1
Pietraroiasuchus_ormezzanoi	1	?	?	1	?	0	0	0	0	0	?			0		0	2	0	0	?	?	?	?	?	?	?	1	?	?	0	?	?	0	1	?	?	0	0	1	0	0	1		0	0	?	0	0	2
Pachycheilosuchus_trinquei	?	?	?	?	?	?	?	?	?	?	?			?		?	?	0	?	?	?	?	?	?	?	?	?	?	?	?	?	?	?	?	?	?	?	?	?	?	?	?		?	?	?	?	?	?
Iharkutosuchus_makadii	1	?	?	1	2	0	0	0	0	0	1			0		0	2	0	0	?	?	?	?	?	1	2	?	?	?	?	0	?	0	0	0	?	0	0	1	0	0	1		0	0	0	0	0	2
Gavialis_gangeticus	1	1	0	1	?	1	1	0	0	1	1			0		0	2	0	0	0	0	0	1	1	1	2	1	0	0	0	0	-	0	1	0	?	0	0	1	0	0	1		0	0	?	0	0	0
Crocodylus_porosus	1	1	0	1	2	0	0	0	0	0	1			0		0	2	0	0	0	0	0	1	1	1	2	1	0	0	0	0	1	0	1	0	?	0	0	1	0	0	1		0	0	?	0	0	2
Crocodylus_niloticus	1	1	0	1	2	0	0	0	0	0	1			0		0	2	0	0	0	0	0	1	1	1	2	1	0	0	0	0	1	0	1	0	?	0	0	1	0	0	1		0	0	?	0	0	2
Alligator_mississippiensis	1	1	0	1	2	0	0	0	0	0	1			0		0	2	0	0	0	0	0	1	1	1	2	1	0	0	0	0	1	0	1	0	?	0	0	1	0	0	1		0	0	0	0	0	2
Sinemurian_taxon	?	?	?	?	?	?	?	0	0	?	3			?		?	?	0	?	?	?	?	?	?	?	?	?	?	?	?	?	?	?	?	?	?	?	?	?	?	?	?		?	?	?	?	?	?
Steneosaurus_gracilirostris	1	0	0	0	0	2	1	0	0	0	3			0		0	2	?	?	1	1	?	0	?	0	?	0	1	1	0	0	-	0	1	1	?	0	0	1	0	1	0		0	0	?	0	0	{01}
Mystriosaurus_laurillardi	1	?	?	?	1	0	1	0	0	0	3			0		?	?	?	?	?	?	?	?	?	?	?	1	1	1	0	0	-	0	0	1	1	0	0	1	0	1	0		0	0	?	0	1	1
Chinese_teleosauroid	1	3	1	0	1	0	1	0	0	0	0			0		0	2	0	0	1	1	?	?	2	?	2	?	1	1	0	0	-	0	0	1	1	0	0	1	0	1	0		0	0	0	0	1	0
Platysuchus_multiscrobiculatus	1	5	0	0	1	2	1	0	0	0	3			0		0	2	?	0	?	?	?	?	2	?	?	0	1	1	0	0	-	0	0	1	?	0	0	1	0	1	0		0	0	?	?	1	1
Teleosaurus_cadomensis	1	5	0	0	?	2	1	0	0	1	3			0		0	2	0	0	?	?	?	0	2	0	?	?	?	?	0	0	-	?	0	1	?	0	0	1	0	?	?		0	?	?	?	?	1
Mycterosuchus_nasutus	1	3	1	0	0	2	1	0	0	1	3			0		0	2	0	0	?	?	?	?	2	?	?	1	1	1	0	0	-	0	0	1	?	0	0	1	0	1	0		0	0	0	0	1	?
Teleosaurus_megarhinus	?	?	?	?	0	2	1	0	0	1	0			3		0	1	0	?	?	?	?	?	?	?	?	1	1	1	0	0	-	0	0	1	1	0	0	1	0	1	0		0	0	0	0	1	0
Steneosaurus_bollensis	1	0	0	0	{01}	2	1	0	0	0	3			0		0	2	0	0	1	1	?	0	2	?	2	0	1	1	0	0	-	0	1	1	0	0	0	1	0	1	0		0	0	0	0	0	1
Steneosaurus_leedsi	1	3	1	0	0	2	1	0	0	0	3			0		0	2	0	0	?	?	?	?	2	?	?	0	1	1	0	0	-	0	1	1	0	0	0	1	0	1	0		0	0	0	0	0	1
Aeolodon_priscus	?	?	?	?	0	2	1	0	0	1	0			0		1	?	?	?	?	?	?	?	?	?	?	?	?	?	?	0	-	0	?	1	1	0	0	?	0	?	?		0	0	?	?	?	1
Steneosaurus_larteti	1	?	?	?	1	2	1	0	0	0	3			0		0	2	0	0	?	?	?	?	2	?	?	0	1	1	0	0	-	0	1	1	0	0	0	1	0	1	0		0	0	0	0	0	?
Steneosaurus_heberti	1	3	1	0	1	2	1	0	0	0	3			0		0	2	0	0	?	?	?	?	2	?	2	0	1	1	0	0	-	0	1	1	0	0	0	1	0	1	0		0	0	0	0	0	?
Steneosaurus_edwardsi	1	3	1	0	1	0	1	0	0	0	3			0		0	2	0	0	?	?	?	?	2	?	?	0	1	1	0	0	-	0	1	1	0	0	0	1	0	1	0		0	0	0	0	0	1
Lemmysuchus_obtusidens	1	3	1	0	1	0	1	0	0	0	3			0		0	2	0	0	?	?	?	?	2	?	?	1	1	1	0	0	-	0	1	1	0	0	0	1	0	1	0		0	0	0	0	0	1
Machimosaurus_buffetauti	1	3	1	0	1	0	0	0	0	0	3			0		0	2	0	0	?	?	?	?	2	?	?	1	1	1	0	0	0	0	1	1	0	0	0	1	0	1	0		0	0	0	0	0	1
Machimosaurus_mosae	1	?	?	0	2	0	0	0	0	0	2			0		0	2	0	0	?	?	?	?	?	?	?	1	1	1	?	0	0	0	1	1	?	0	0	1	0	1	0		0	0	0	0	0	?
Machimosaurus_hugii	?	?	?	?	?	0	0	0	0	0	2			?		?	?	?	?	?	?	?	?	?	?	?	1	?	?	?	0	?	?	?	?	?	?	?	?	0	?	?		?	?	?	?	?	?
Machimosaurus_rex	?	?	?	?	?	0	0	0	0	0	2			?		?	?	?	0	?	?	?	?	?	?	?	?	?	?	?	0	?	?	?	?	?	?	?	?	?	?	?		?	?	?	?	?	?
Pelagosaurus_typus	1	2	1	0	0	2	1	0	0	0	3			0		0	2	0	0	1	1	0	0	2	0	2	0	1	1	0	0	-	0	1	0	?	0	0	1	0	1	?		0	0	?	0	0	0
Pelagosaurus_tomarensis	1	3	1	0	0	2	1	0	0	0	2			1		0	1	0	?	?	?	?	?	2	0	2	?	1	1	0	0	-	?	?	?	?	?	?	?	?	?	?		?	?	?	?	?	?
Peipehsuchus_teleorhinus	?	?	?	?	?	?	1	0	0	?	3			?		?	?	?	?	?	?	?	?	?	?	?	?	1	1	?	?	?	0	1	2	?	0	0	1	0	1	0		0	0	?	0	0	1
Teleidosaurus_calvadosii	1	3	1	0	?	0	1	0	0	0	3			0		0	2	?	?	?	?	?	?	2	?	?	?	1	1	0	0	-	0	1	2	?	0	0	1	0	1	0		0	0	?	0	0	1
Metriorhynchoid_indet_T	1	3	1	0	0	2	1	0	0	0	3			0		0	2	0	0	?	?	?	0	2	0	2	0	1	1	0	0	-	?	?	?	?	?	?	?	?	?	?		?	?	?	?	?	?
Magyarosuchus_fitosi	?	?	?	?	?	?	?	?	?	?	?			?		?	?	?	?	?	?	?	?	?	?	?	?	?	?	?	?	?	?	?	?	?	?	?	?	?	?	?		?	?	?	?	?	?
Eoneustes_gaudryi	?	?	?	?	?	?	1	0	0	0	3			0		?	?	0	?	?	?	?	?	?	?	?	?	?	?	0	0	?	?	?	?	?	?	?	?	?	?	?		?	?	?	?	?	?
Chile_metriorhynchoid	?	?	?	?	?	?	?	?	?	?	?			0		?	?	?	?	?	?	?	?	?	?	?	?	?	?	?	?	?	?	?	?	?	?	?	?	?	?	?		?	?	?	?	?	?
Zoneait_nargorum	?	?	?	?	?	?	1	0	?	?	?			0		0	?	?	?	?	?	?	0	?	?	?	?	?	?	?	0	?	?	?	?	?	?	?	?	?	?	?		?	?	?	?	?	?
Solnhofen_Cricosaurus	?	?	?	?	?	?	?	0	0	?	2			?		?	?	?	?	?	?	?	?	?	?	?	1	1	1	0	0	-	0	1	3	?	0	-	3	0	1	?		0	-	?	0	0	3
Cricosaurus_bambergensis	?	?	?	?	?	?	?	0	?	?	?			?		?	?	?	?	?	?	?	?	?	?	?	?	?	?	?	?	-	?	?	?	?	?	?	?	?	?	?		?	?	0	0	0	?
Cricosaurus_elegans	?	?	?	?	?	2	1	0	0	0	2			0		?	0	?	?	?	?	?	?	?	?	?	1	1	1	0	0	-	0	1	3	?	0	-	3	0	?	?		0	-	?	0	0	3
Cricosaurus_suevicus	0	3	1	?	?	2	1	0	0	0	2			0		1	0	?	?	?	?	?	?	?	?	?	1	1	1	0	0	-	0	1	3	?	0	-	3	0	1	?		0	-	?	0	0	3
Cricosaurus_schroederi	0	3	1	0	?	?	1	0	0	0	0			3		1	0	0	?	?	?	?	?	2	?	?	1	1	1	0	0	-	0	1	?	?	?	?	?	?	?	?		?	?	?	?	?	?
Cricosaurus_araucanensis	0	3	1	0	?	2	1	0	0	0	0			3		1	0	0	0	?	1	1	?	2	?	2	1	1	1	0	0	-	0	1	3	?	0	-	3	0	1	?		0	-	0	0	0	3
Cricosaurus_vignaudi	?	?	?	?	?	2	1	0	0	0	0			3		1	0	?	?	?	?	?	?	?	?	?	?	?	?	?	?	-	?	?	?	?	?	-	3	0	?	?		0	-	?	?	?	3
Cricosaurus_lithographicus	?	?	?	?	?	2	1	0	0	0	0			3		1	0	?	?	?	?	?	?	?	?	?	?	1	1	?	?	-	0	1	3	?	0	-	3	0	?	?		0	-	?	0	0	3
Dakosaurus_lissocephalus	?	?	?	0	?	?	?	?	?	?	?			1		1	0	?	?	?	?	?	?	2	?	?	?	?	?	?	?	?	?	?	?	?	?	?	?	?	?	?		?	?	?	?	?	?
Cricosaurus_sp_Cuba	1	?	?	?	?	?	?	?	?	?	?			1		?	?	?	?	?	?	?	?	?	?	?	?	?	?	?	?	?	?	?	?	?	?	?	?	?	?	?		?	?	?	?	?	?
Rhacheosaurus_gracilis	1	3	1	0	?	2	1	0	0	0	2			?		?	?	?	?	?	?	?	?	2	?	?	1	?	1	0	0	-	0	1	3	?	0	-	3	0	?	?		0	-	?	?	0	3
Metriorhynchidae_indet_Cuba	1	?	?	?	?	?	1	0	?	?	?			?		?	?	?	?	?	?	?	?	?	?	?	?	?	?	?	?	?	?	?	?	?	?	?	?	?	?	?		?	?	?	?	?	?
Cricosaurus_macrospondylus	?	?	?	?	?	?	1	0	0	?	2			3		1	?	?	?	?	?	?	?	?	?	?	?	1	1	0	0	-	0	1	3	?	0	-	3	0	?	?		0	-	?	0	0	3
Cricosaurus_saltillensis	?	?	?	?	?	0	?	0	0	0	2			3		1	?	?	?	?	?	?	?	?	?	?	?	?	?	0	?	-	0	1	3	?	0	-	3	0	?	?		0	-	?	0	0	?
Metriorhynchus_palpebrosus	1	3	1	0	?	2	1	0	0	0	2			?		?	1	0	?	?	?	?	?	2	?	?	?	?	?	0	0	-	0	1	3	?	0	-	3	0	?	?		0	-	0	0	0	?
Maledictosuchus_nuyivijanan	?	?	?	?	?	?	?	0	0	?	2			?		?	?	0	?	?	?	1	?	?	?	?	?	?	1	0	0	-	?	?	?	?	?	?	?	?	?	?		?	?	?	?	?	?
Maledictosuchus_riclaensis	1	3	1	?	?	2	1	0	0	0	2			2		?	1	0	?	?	?	?	?	?	?	?	1	1	1	0	0	-	0	1	3	?	0	-	2	0	?	?		0	-	0	0	0	1
Gracilineustes_acutus	?	?	?	?	?	2	1	0	0	0	?			3		?	?	?	?	?	?	?	?	?	?	?	?	?	?	?	?	-	?	1	3	?	?	0	2	?	?	?		0	0	?	0	?	0
Gracilineustes_leedsi	1	3	1	0	0	2	1	0	0	0	0			3		1	0	0	?	?	?	?	?	2	0	2	1	1	1	0	0	-	0	1	3	?	0	0	2	0	1	0		0	0	0	0	0	1
Metriorhynchus_geoffroyii	?	?	?	?	?	?	1	0	0	?	?			?		?	?	?	?	?	?	?	?	?	?	?	1	1	1	?	0	?	0	1	3	?	0	0	2	0	1	0		0	0	0	0	0	1
Metriorhynchus_superciliosus	1	3	1	0	1	2	1	0	0	0	3			0		0	1	0	0	?	1	1	?	2	0	2	1	1	1	0	0	-	0	1	3	?	0	0	2	0	1	0		0	0	0	0	0	1
Geosaurine_indet_Argentina	?	?	?	?	?	?	?	?	?	?	?			0		?	?	?	?	?	?	?	?	?	?	?	?	?	?	?	?	?	?	?	?	?	?	?	?	?	?	?		?	?	?	?	?	?
Metriorhynchus'_casamiquelai	?	?	?	0	1	0	0	0	0	0	0			3		?	?	0	0	?	?	?	?	2	?	?	?	?	?	0	0	0	0	1	3	?	?	0	2	0	?	?		0	0	?	0	?	2
Metriorhynchus'_westermanni	?	?	?	?	?	?	?	?	0	0	?			3		?	?	?	?	?	?	?	0	?	?	2	?	?	?	?	?	?	?	?	?	?	?	?	?	?	?	?		?	?	?	?	?	?
Neptunidraco_ammoniticus	?	?	?	?	?	?	0	?	?	?	?			?		?	?	?	?	?	?	?	?	?	?	?	?	?	?	?	?	?	?	?	?	?	?	?	?	?	?	?		?	?	?	?	?	?
Metriorhynchus_brachyrhynchus	1	3	1	0	{12}	0	0	0	0	0	3			0		0	1	0	0	?	?	?	?	2	0	2	1	1	1	0	0	0	0	1	3	?	0	0	2	0	1	0		0	0	0	0	0	1
Tyrannoneustes_lythrodectikos	1	3	1	0	?	0	0	0	0	0	3			0		0	1	0	?	?	?	?	?	?	0	?	1	1	1	0	0	-	0	1	3	?	0	0	2	0	1	?		0	0	0	?	0	?
Dorchester_hastifer	1	?	?	?	?	0	?	0	0	0	2			2		0	?	0	?	?	?	?	?	?	?	?	1	1	1	0	?	?	0	1	3	?	0	0	2	0	1	0		0	0	0	0	0	1
Swiss_hastifer	?	?	?	?	?	?	?	?	?	?	2			?		?	?	?	?	?	?	?	?	?	?	?	1	?	1	?	?	?	0	1	3	?	0	0	2	0	1	0		0	0	0	0	0	1
Chouquet_hastifer	?	?	?	?	?	0	0	0	0	0	2			2		?	?	0	?	?	?	?	?	?	?	?	?	?	?	?	?	?	0	1	3	?	0	0	2	0	1	?		0	0	?	0	0	2
Metriorhynchus_hastifer	?	?	?	?	?	0	0	0	0	0	2			2		?	?	0	?	?	?	?	?	?	?	?	?	?	?	?	?	?	?	?	?	?	?	?	2	?	?	?		0	?	?	?	?	?
Mr_Passmores_specimen	?	?	?	0	?	0	0	0	0	0	3			2		?	?	?	?	?	?	?	?	?	?	?	1	?	1	?	0	?	0	1	3	?	0	0	2	0	?	0		0	0	?	0	?	?
cf_Torvoneustes_(MANCH_J6459)	?	?	?	?	?	?	0	0	0	?	2			2		?	?	?	?	?	?	?	?	?	?	?	?	?	?	?	?	?	?	?	?	?	?	?	?	?	?	?		?	?	?	?	?	?
Torvoneustes_coryphaeus	1	3	1	0	?	?	?	?	?	0	2			2		1	0	0	?	?	?	?	?	2	?	?	?	?	?	0	0	?	?	?	?	?	?	?	?	?	?	?		?	?	?	?	?	?
Torvoneustes_carpenteri	?	?	?	?	?	0	0	0	0	0	2			3		1	0	0	?	?	?	?	?	?	?	?	?	?	?	0	0	?	0	?	3	?	0	0	2	?	1	0		0	0	?	0	?	1
Torvoneustes_mexicanus	?	?	?	?	?	?	?	?	?	?	?			?		?	?	?	?	?	?	?	?	?	?	?	?	?	?	?	?	?	?	?	?	?	?	?	?	?	?	?		?	?	?	?	?	?
Torvoneustes_sp_(SEC_K1707)	?	?	?	?	?	?	?	?	?	?	?			?		?	?	?	?	?	?	?	?	?	?	?	?	?	?	?	?	?	?	?	?	?	?	?	?	?	?	?		?	?	?	?	?	?
Purranisaurus_potens	1	3	1	0	?	?	?	0	0	0	?			?		?	?	0	0	?	?	?	?	2	0	2	?	?	?	0	0	?	?	?	?	?	?	?	?	?	?	?		?	?	?	?	?	?
Ieldraan_melkshamensis	?	?	?	?	?	?	?	?	0	?	1			0		?	?	?	?	?	?	?	?	?	?	?	?	?	?	?	0	0	?	?	?	?	?	?	?	?	?	?		?	?	?	?	?	?
Geosaurus_giganteus	?	?	?	?	?	0	?	?	0	?	1			3		?	?	?	0	?	?	?	?	?	?	?	1	1	1	0	0	0	0	?	3	?	0	0	2	?	?	?		?	0	?	?	?	2
Geosaurus_grandis	?	3	1	0	?	0	0	0	0	0	1			3		1	?	0	?	?	?	?	?	?	?	?	1	1	1	0	0	0	0	1	3	?	0	0	2	0	?	0		?	0	?	0	0	2
Geosaurus_lapparenti	?	?	?	?	?	?	?	?	?	?	?			3		?	?	?	?	?	?	?	?	?	?	?	?	?	?	?	?	?	?	?	?	?	?	?	?	?	?	?		?	?	?	?	?	?
Suchodus_durobrivensis	1	3	1	0	?	0	0	0	0	0	2			0		0	1	0	?	?	?	?	?	2	?	?	1	?	?	?	0	0	0	?	3	?	0	?	2	?	?	?		?	?	?	?	?	?
Plesiosuchus_manselii	1	3	1	0	?	0	0	0	0	0	2			1		?	?	0	?	?	?	?	?	2	?	2	1	?	?	0	0	0	0	1	3	?	0	0	2	0	1	0		0	0	0	0	0	2
Dakosaurus_andiniensis	0	3	1	0	?	0	2	1	0	0	0			3		1	?	0	0	?	1	?	?	?	?	?	1	1	1	0	0	0	0	1	3	?	0	0	3	0	?	?		?	?	?	0	0	2
Dakosaurus_maximus	?	3	1	?	?	0	0	1	0	0	3			1		1	?	0	?	?	?	?	?	?	?	?	1	1	1	0	0	0	0	1	3	?	0	0	3	0	1	0		?	?	?	0	0	2
Mr_Leeds_dakosaur	1	3	1	0	?	0	0	1	0	0	3			0		0	1	0	?	?	?	?	?	2	0	?	1	1	1	0	0	0	0	1	3	?	0	0	?	?	?	0		0	0	?	0	0	2
Vaches_Noire_dakosaur	?	?	?	?	?	?	?	1	0	0	3			0		?	?	?	?	?	?	?	?	?	?	?	?	?	?	0	0	?	?	?	?	?	?	?	?	?	?	?		?	?	?	?	?	?
MMJ teleosauroids
Steneosaurus_gracilirostris	1	0	0	0	0	2	1	0	0	0	3			0		0	2	?	?	?	?	?	0	?	0	?	0	1	1	0	0	-	0	1	1	?	0	0	1	0	1	0		0	0	?	-	0	0
Mystriosaurus_brevior	1	?	?	?	1	0	1	0	0	0	3			0		?	?	?	?	?	?	?	?	?	?	?	1	1	1	0	0	-	0	0	1	1	0	0	1	0	1	0		0	0	?	-	1	1
Mysteriosaurus_laurillardi	?	?	?	?	?	0	1	0	0	?	3			?		?	?	?	?	?	?	?	?	?	?	?	1	1	1	0	?	-	0	0	1	1	0	0	1	0	1	0		0	0	?	-	1	1
Steneosaurus_stephani	1	?	?	?	?	?	?	?	0	0	?			0		0	2	0	?	?	?	?	?	?	?	?	?	?	?	?	0	?	?	?	?	?	?	?	?	?	?	?		?	?	?	?	?	?
Chinese_teleosauroid	1	3	1	0	1	0	1	0	0	0	0			0		0	2	0	0	1	1	?	?	2	?	2	0	1	1	0	0	-	0	0	1	1	0	0	1	0	1	0		0	0	0	-	1	0
Thai_teleosauroid_PN_16_20	1	4	0	0	1	2	1	0	0	1	0			0		0	2	0	0	?	?	?	?	2	0	2	0	1	1	0	0	-	0	0	1	1	0	0	1	0	1	0		0	0	0	-	1	0
Thai_teleosauroid_PRC_239	1	4	0	0	?	2	1	0	0	0	0			0		0	2	?	?	?	?	?	?	?	?	?	0	1	1	0	0	-	0	0	1	0	0	0	1	0	1	0		0	0	?	-	1	1
Steneosaurus_baroni	?	?	?	?	?	?	1	0	0	?	3			?		?	?	0	?	?	?	?	?	?	?	?	0	1	1	0	?	-	?	?	1	?	0	?	1	?	?	?		0	?	0	?	0	?
Platysuchus_multiscrobiculatus	1	5	0	0	1	2	1	0	0	0	3			0		0	2	0	0	?	?	?	?	2	?	?	0	1	1	0	0	-	0	0	1	?	0	0	1	0	1	0		0	0	?	-	1	1
Teleosaurus_cadomensis	1	5	0	0	?	2	1	0	0	1	3			0		0	2	0	0	?	?	?	0	2	0	?	?	?	?	0	0	-	?	0	1	?	0	0	1	?	?	?		0	?	?	?	?	?
Mycterosuchus_nasutus	1	4	0	0	0	2	1	0	0	1	3			0		0	2	0	0	?	?	?	?	2	?	?	0	1	1	0	0	-	?	0	1	?	0	0	1	0	1	0		0	0	0	-	1	0
Bathysuchus_megarhinus	1	?	?	0	0	2	1	0	0	1	0			3		0	1	0	?	?	?	?	?	?	?	?	0	1	1	0	0	-	0	0	1	1	0	0	1	0	1	0		0	0	0	-	1	0
Steneosaurus_bollensis	1	0	0	0	{01}	2	1	0	0	0	3			0		0	2	0	0	1	1	?	0	2	?	2	0	1	1	0	0	-	0	1	1	0	0	0	1	0	1	0		0	0	0	-	0	1
Steneosaurus_leedsi	1	3	1	0	0	2	1	0	0	0	3			0		0	2	0	0	?	?	?	?	2	?	?	0	1	1	0	0	-	0	1	1	0	0	0	1	0	1	0		0	0	0	-	0	1
Aeolodon_priscus	?	?	?	?	0	2	1	0	0	1	0			1		?	?	?	?	?	?	?	?	?	?	?	0	1	1	0	0	-	0	0	1	1	0	0	?	0	?	0		0	0	?	-	1	0
Steneosaurus_megistorhynchus	?	?	?	?	?	2	?	0	0	0	?			0		?	?	0	?	?	?	?	?	?	?	?	?	?	?	?	?	-	?	?	?	?	?	?	?	?	?	?		?	?	?	?	?	?
Yvridiosuchus_boutilieri	1	3	1	0	1	0	1	0	0	0	3			0		0	2	0	0	?	?	?	?	2	?	?	1	1	1	0	0	-	0	1	1	0	0	0	1	0	1	0		0	0	?	-	0	1
Deslongchampsina_larteti	1	?	?	?	1	2	1	0	0	0	3			0		0	2	0	0	?	?	?	?	2	?	?	0	1	1	0	0	-	0	1	1	0	0	0	1	0	1	0		0	0	0	-	0	?
Steneosaurus_heberti	1	3	1	0	1	2	1	0	0	0	3			0		0	2	0	0	?	?	?	?	2	?	2	0	1	1	0	0	-	0	1	1	0	0	0	1	0	1	0		0	0	0	-	0	?
Steneosaurus_rostromajor	?	?	?	?	?	?	1	?	?	?	3			?		?	?	0	?	?	?	?	?	?	?	?	?	?	1	0	?	-	?	?	?	?	?	?	?	?	?	?		?	?	?	-	?	?
Steneosaurus_edwardsi	1	3	1	0	1	0	1	0	0	0	3			0		0	2	0	0	?	?	?	?	2	?	?	0	1	1	0	0	-	0	1	1	0	0	0	1	0	1	0		0	0	0	-	0	1
Lemmysuchus_obtusidens	1	3	1	0	1	0	1	0	0	0	3			0		0	2	0	0	?	?	?	?	2	?	?	1	1	1	0	0	-	0	1	1	0	0	0	1	0	1	0		0	0	0	-	0	1
Machimosaurus_buffetauti	1	3	1	0	1	0	0	0	0	0	3			0		0	2	0	0	?	?	?	?	2	?	?	1	1	1	0	0	0	0	1	1	0	0	0	1	0	1	0		0	0	0	-	0	1
Machimosaurus_mosae	1	?	?	0	2	0	0	0	0	0	2			0		0	2	0	0	?	?	?	?	?	?	?	1	1	1	?	0	0	0	1	1	?	0	0	1	0	1	0		0	0	0	-	0	?
Machimosaurus_hugii	?	?	?	?	?	0	0	0	0	0	2			?		?	?	0	?	?	?	?	?	?	?	?	?	?	?	0	0	?	?	?	?	?	?	?	?	?	?	?		?	?	?	?	?	?
Machimosaurus_rex	?	?	?	?	?	0	0	0	0	0	2			?		?	?	?	0	?	?	?	?	?	?	?	?	?	?	?	0	?	?	?	?	?	?	?	?	?	?	?		?	?	?	?	?	?
Cassissuchus_sanziuami	0	?	?	?	?	0	2	0	0	?	0			0		0	2	?	?	?	?	?	?	?	?	2	0	?	?	?	?	?	0	0	0	?	0	0	1	0	?	0		0	0	0	0	0	1
[truncated: 453 more columns]
